# Supplementary material
Source: publisher figshare collection journal article supplement (https://gsapubs.figshare.com/ndownloader/files/23300900)
Supplement: Supplementary file 1 [file 23300900]

**“Insights into surface runoff on early Mars from paleolake basin morphology and stratigraphy”, DOI:10.1130/G37734.1.**

---

#### **ADDITIONAL DETAIL ON METHODS AND RESULTS:**

The full results of our analysis, including paleolake valley morphology and basin degradation state for our entire catalog of 425 basins is shown in **Table DR1**. Our complete methods for obtaining these results are described further below.

##### **Paleolake Valley Morphology**

We assessed the morphology of the inlet and outlet valleys associated with our catalog of paleolakes based on their level of regional fluvial integration, amount of degradation, and their similarity in morphology to ancient valley networks (e.g., Howard et al., 2005; Irwin et al., 2005; Hynek et al., 2010). A primary metric used for determining the level of regional fluvial integration is the Strahler order, which is related to the number and scale of valley tributaries. A valley with no tributaries is assigned a value of 1, and when two 1<sup>st</sup> order valleys join they become a 2<sup>nd</sup> order valley. When two 2<sup>nd</sup> order valleys join, they become a 3<sup>rd</sup> order valley, and so on. Therefore, valleys with higher Strahler orders have more tributaries and are more integrated with the landscape (Strahler, 1952). Where possible, Strahler order values were taken from the Hynek et al. (2010) global catalog of valley networks, as referenced in **Table DR1**.

For our analysis, we determined the maximum Strahler order for the valley systems associated with the basin (**Table DR1**). We focused primarily on the Strahler order of the inlet valley; however, for many of the studied open-basin lakes, the basin

watershed is too heavily eroded to confidently identify all inlet valleys and their tributaries. In many of these cases, we instead opted to use the Strahler order of the valley system that the basin outlet valley joins downstream. Such cases are noted in **Table DR1**. For open-basin lakes with eroded watersheds and outlet valleys that do not join major valley network systems downstream, we instead used the inlet valley Strahler order, although note that the values are uncertain and should be viewed as a lower-bound due to potential erosion of lower order valleys in the catchment.

In addition to the Strahler order, we also looked at the qualitative degradation state of the inlet and outlet valleys (i.e., how steep/sharp are the valley walls? do they display evidence for post-incision erosion, modification, or burial by younger material?). Using a combination of these two metrics, we assigned each of the basins in our catalog one of two classes: isolated inlet valleys (e.g., **Figures 1A, DR2**) or valley network-fed (e.g., **Figures 1B,C, DR1, DR3**).

Isolated inlet valley paleolakes are fed by valleys with sharply defined walls and minimal evidence for post-incision modification. Approximately 95% of these valleys have a Strahler order of 1, with the other ~5% having values of 2 (**Figure DR5A**). In the latter cases, the tributaries are often very short and do not extend further than a few kilometers from the main trunk valley.

Valley network-fed paleolakes are fed by more heavily eroded and modified valleys with less sharply defined walls. Approximately 90% of these valleys have a Strahler order  $\geq 2$ , including over a dozen basins with values  $\geq 5$  (**Figure DR5A**). For valley network-fed paleolakes with a Strahler order of 1, the valleys are: (1) heavily eroded, and so the identification of all the related tributaries is highly uncertain, (2) the

outlet of an open-basin lake directly upstream, i.e., they are contained within an integrated lake chain (Fassett and Head, 2008b), or (3) visibly buried by younger material.

We also note that our classification system is distinct from the inlet valley classification for closed-basin lakes presented by Goudge et al. (2015), which is based only on the length of the inlet valley. Goudge et al. (2015) classified basins as having either “long” (>20 km in length) or “short” (<20 km in length) inlet valleys. The classification presented here is instead based on the level of regional integration and degradation state of the valleys. While many of our isolated inlet valleys are classified as “short” by Goudge et al. (2015), and many of our valley network inlets are classified as “long” by Goudge et al. (2015), the relationship is not universal. The catalog presented here contains examples of both “short” (<20 km) inlet valleys classified as valley networks, and “long” (>20 km) inlet valleys classified as isolated inlet valleys.

### **Paleolake Basin Degradation State**

We assessed the degradation state of the basins that host the 425 paleolakes in our catalog to help constrain the relative ages of these paleolakes. As the majority (~85%) of paleolake basins in our catalog are hosted by impact craters, a primary metric we used was the crater degradation state presented by Robbins and Hynek (2012). This degradation state is a qualitative assessment of the erosion and modification of the crater rim, ejecta, and interior, and is divided into four classes, with a value of 1 being assigned to the most degraded craters and 4 being assigned to the morphologically freshest craters (Robbins and Hynek, 2012). As younger craters tend to be less degraded than older craters of approximately the same diameter (e.g., Craddock et al., 1997; Craddock and

Howard, 2002; Mangold et al., 2012; Robbins and Hynek, 2012), higher Robbins and Hynek (2012) degradation state values tend to indicate geologically younger craters. The degradation state of the host basin for a paleolake acts as an upper bound on the relative age of that paleolake – no lake can be older than the basin in which it was contained.

Several (65) open-basin lakes in our catalog are not defined by single impact craters in the Robbins and Hynek (2012) database. Nine of these basins are contained within eroded, circular basins that appear to be heavily eroded craters not mapped by Robbins and Hynek (2012). However, the majority (56) of these basins are contained within heavily eroded inter-crater basins, such as the Eridania basin (Irwin et al., 2002).

Our results (**Figure DR5B**; **Table DR1**) show that approximately 90% of valley network-fed paleolakes are contained within: (1) craters with a Robbins and Hynek (2012) degradation state of 1, (2) an unmapped, heavily eroded impact crater, or (3) a heavily eroded inter-crater basin. This observation is consistent with our conclusion that valley network-fed paleolakes formed early in martian history, during the major era of valley network formation.

In contrast, >40% of isolated inlet valley paleolakes have a Robbins and Hynek (2012) basin degradation state of >1. This is consistent with our conclusion that isolated inlet valley paleolakes formed later in martian history, subsequent to the major era of valley network formation. Although a slight majority of isolated inlet valley paleolakes are contained within craters with a Robbins and Hynek (2012) basin degradation state of 1, this is still consistent with late fluvial activity – old craters can easily be breached by valleys associated with young fluvial activity (i.e., isolated inlet valleys). The important observation is that there are numerous less degraded (i.e., geologically younger) craters



breached by isolated inlet valleys, which requires fluvial activity later in martian history, after these craters formed.

**FIGURES:**

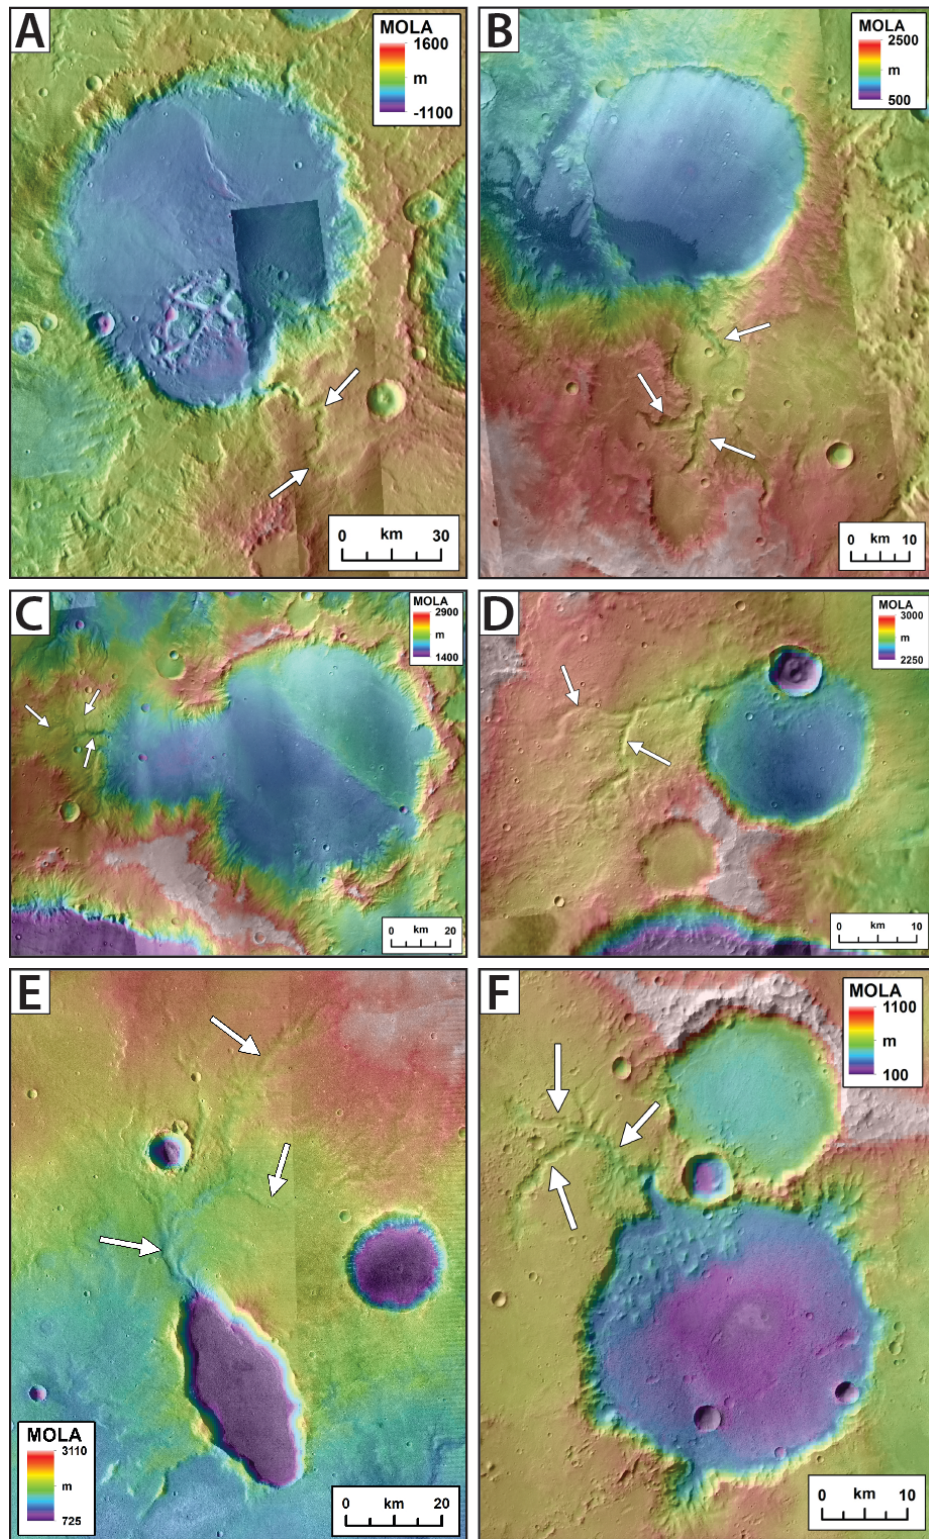

Figure DR1. Additional examples of valley network-fed closed-basin lakes. White arrows indicate inlet valleys. North is up in all images. **A:** Valley network-fed closed-basin lake at 7.1°N, 38.5°E. MOLA gridded topography overlain on a mosaic of CTX images D03\_028576\_1839 and P03\_002072\_1865 and the THEMIS ~100 m/pixel global

daytime infrared mosaic. **B:** Valley network-fed closed-basin lake at  $-9.7^{\circ}\text{N}$ ,  $129.4^{\circ}\text{E}$ . MOLA gridded topography overlain on a mosaic of CTX images P22\_009769\_1686, P17\_007765\_1671, P16\_007119\_1701, P08\_003994\_1700, G13\_023153\_1702, and B17\_016349\_1690 and the THEMIS  $\sim 100$  m/pixel global daytime infrared mosaic. **C:** Valley network-fed closed-basin lake at  $-11.3^{\circ}\text{N}$ ,  $131.4^{\circ}\text{E}$ . MOLA gridded topography overlain on a mosaic of CTX images B11\_013738\_1680, P22\_009769\_1686, P07\_003928\_1675, G14\_023865\_1699, G06\_020674\_1686, D21\_035469\_1695, D02\_028032\_1693, D02\_027821\_1713, B19\_016850\_1685, and B16\_016072\_1685 and the THEMIS  $\sim 100$  m/pixel global daytime infrared mosaic. **D:** Valley network-fed closed-basin lake at  $-16.2^{\circ}\text{N}$ ,  $45.9^{\circ}\text{E}$ . MOLA gridded topography overlain on a mosaic of CTX images G22\_026756\_1645, D18\_034259\_1638, and B17\_016418\_1648 and the THEMIS  $\sim 100$  m/pixel global daytime infrared mosaic. **E:** Valley network-fed closed-basin lake at  $-19.4^{\circ}\text{N}$ ,  $53.8^{\circ}\text{E}$ . MOLA gridded topography overlain on a mosaic of HRSC nadir images h2144\_0000 and h7200\_0000. **F:** Valley network-fed closed-basin lake at  $-19.7^{\circ}\text{N}$ ,  $75.7^{\circ}\text{E}$ . MOLA gridded topography overlain on a mosaic of CTX images P17\_007767\_1603, G21\_026478\_1603, and D16\_033559\_1585.



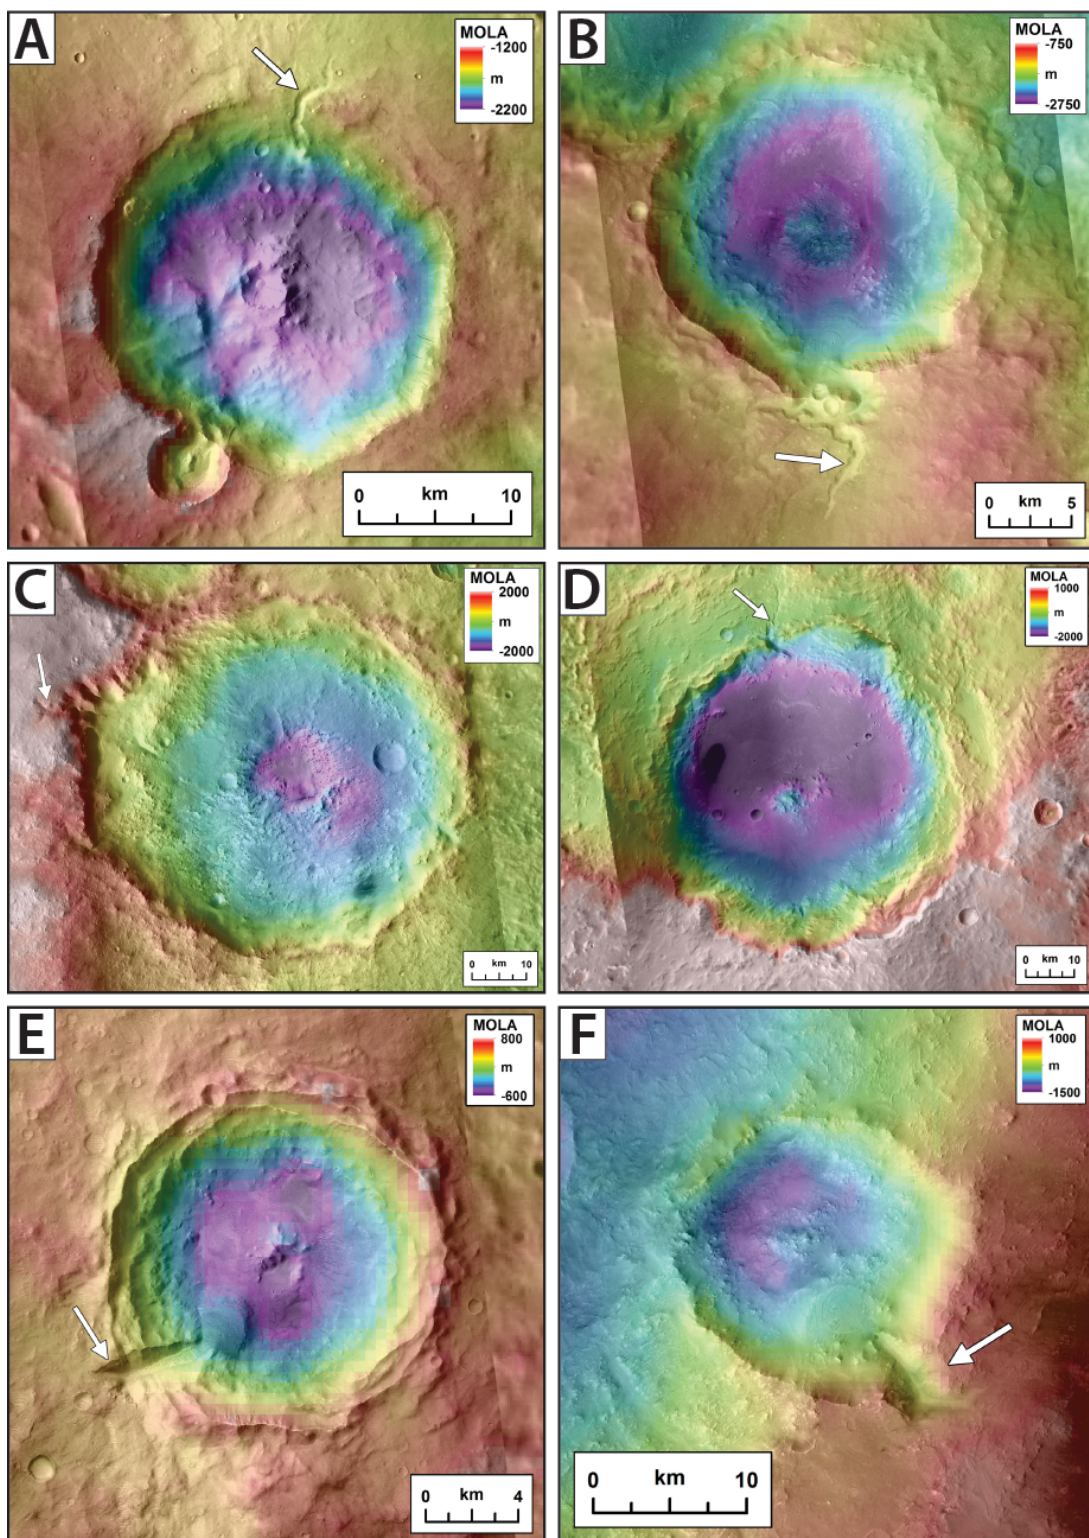

Figure DR2. Additional examples of isolated inlet valley closed-basin lakes. White arrows indicate inlet valleys. North is up in all images. **A:** Isolated inlet valley closed-basin lake at 26.2°N, 24.1°E. MOLA gridded topography overlain on a mosaic of CTX image G23\_027350\_2042 and the THEMIS ~100 m/pixel global daytime infrared mosaic. **B:** Isolated inlet valley closed-basin lake at 16.2°N, -53.2°E. MOLA gridded

topography overlain on a mosaic of CTX image G14\_023687\_1963 and the THEMIS ~100 m/pixel global daytime infrared mosaic. **C:** Isolated inlet valley closed-basin lake at 21.4°N, 58.1°E. MOLA gridded topography overlain on a mosaic of CTX images P17\_007807\_2010, P16\_007161\_2011, P15\_006871\_2020, P14\_006660\_1996, P13\_005948\_2017 and the THEMIS ~100 m/pixel global daytime infrared mosaic. **D:** Isolated inlet valley closed-basin lake at 2.4°N, -51.6°E. MOLA gridded topography overlain on a mosaic of CTX image P06\_003539\_1825, G20\_026166\_1816, G18\_025243\_1835, and D04\_028909\_1829 and the THEMIS ~100 m/pixel global daytime infrared mosaic. **E:** Isolated inlet valley closed-basin lake at 1.5°N, 116.3°E. MOLA gridded topography overlain on a mosaic of CTX image B16\_015967\_1814 and the THEMIS ~100 m/pixel global daytime infrared mosaic. **F:** Isolated inlet valley closed-basin lake at 22.1°N, 66.8°E. MOLA gridded topography overlain on a mosaic of CTX images P14\_006541\_2031 and G02\_019107\_2021.



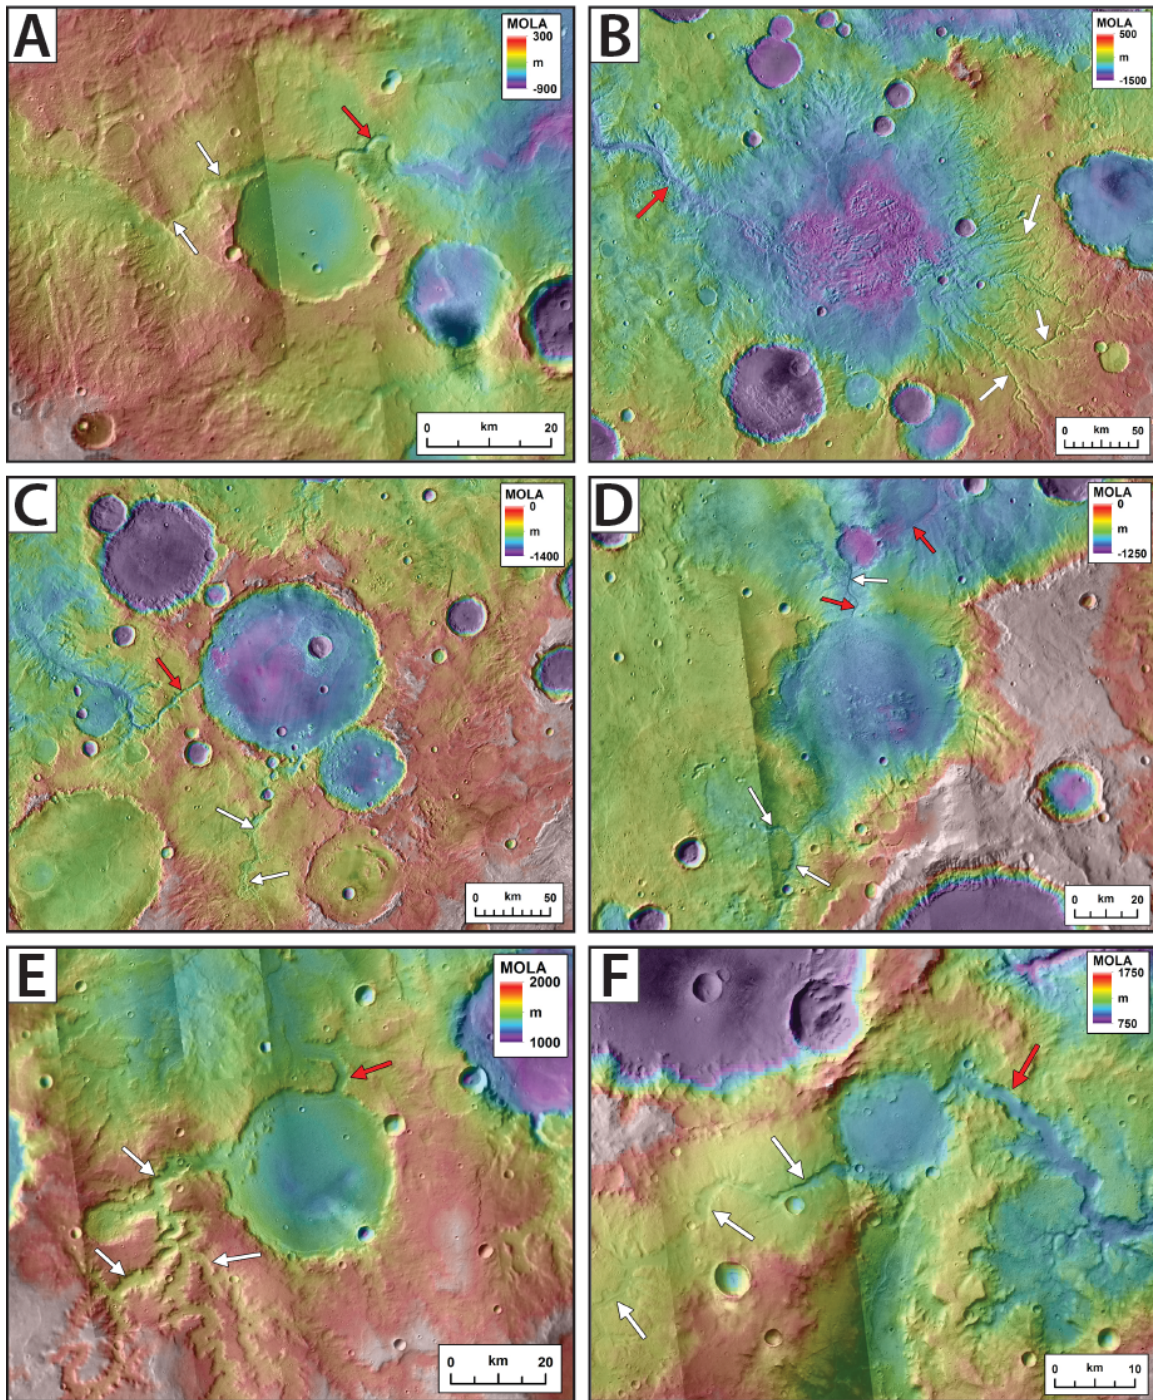

Figure DR3. Additional examples of valley network-fed open-basin lakes. White arrows indicate inlet valleys and red arrows indicate outlet valleys. North is up in all images. **A:** Valley network-fed open-basin lake at  $-12.4^{\circ}\text{N}$ ,  $157.1^{\circ}\text{E}$ . MOLA gridded topography overlain on a mosaic of CTX images P19\_008555\_1676, P12\_005839\_1672, G04\_019750\_1675, B22\_018049\_1678, and B20\_017627\_1676 and the THEMIS  $\sim 100$  m/pixel global daytime infrared mosaic. **B:** Valley network-fed open-basin lake at  $-21.7^{\circ}\text{N}$ ,  $-12.3^{\circ}\text{E}$ . MOLA gridded topography overlain on the THEMIS  $\sim 100$  m/pixel global daytime infrared mosaic. **C:** Valley network-fed open-basin lake at  $-10.6^{\circ}\text{N}$ ,

2.8°E. MOLA gridded topography overlain on the THEMIS ~100 m/pixel global daytime infrared mosaic. **D:** Valley network-fed open-basin lakes at -23.1°N, -23.5°E (main basin) and -22.3°N, -23.6°E (smaller basin to north). Note that the outlet of the main basin directly feeds the smaller basin to the north. MOLA gridded topography overlain on a mosaic of CTX images G18\_025163\_1588, G16\_024596\_1573, B20\_017515\_1569, and B17\_016170\_1572 and the THEMIS ~100 m/pixel global daytime infrared mosaic. **E:** Valley network-fed open-basin lake at -6.4°N, 42.0°E. MOLA gridded topography overlain on a mosaic of CTX images P22\_009759\_1735, P05\_002784\_1732, G22\_026822\_1737, and D19\_034536\_1754 and the THEMIS ~100 m/pixel global daytime infrared mosaic. **F:** Valley network-fed open-basin lake at -7.3°N, 131.1°E. MOLA gridded topography overlain on a mosaic of CTX images G14\_023865\_1699, G04\_019896\_1734, G03\_019474\_1713, D13\_032423\_1735, D04\_028665\_1736, D02\_027821\_1713, and B21\_017773\_1752 and the THEMIS ~100 m/pixel global daytime infrared mosaic.



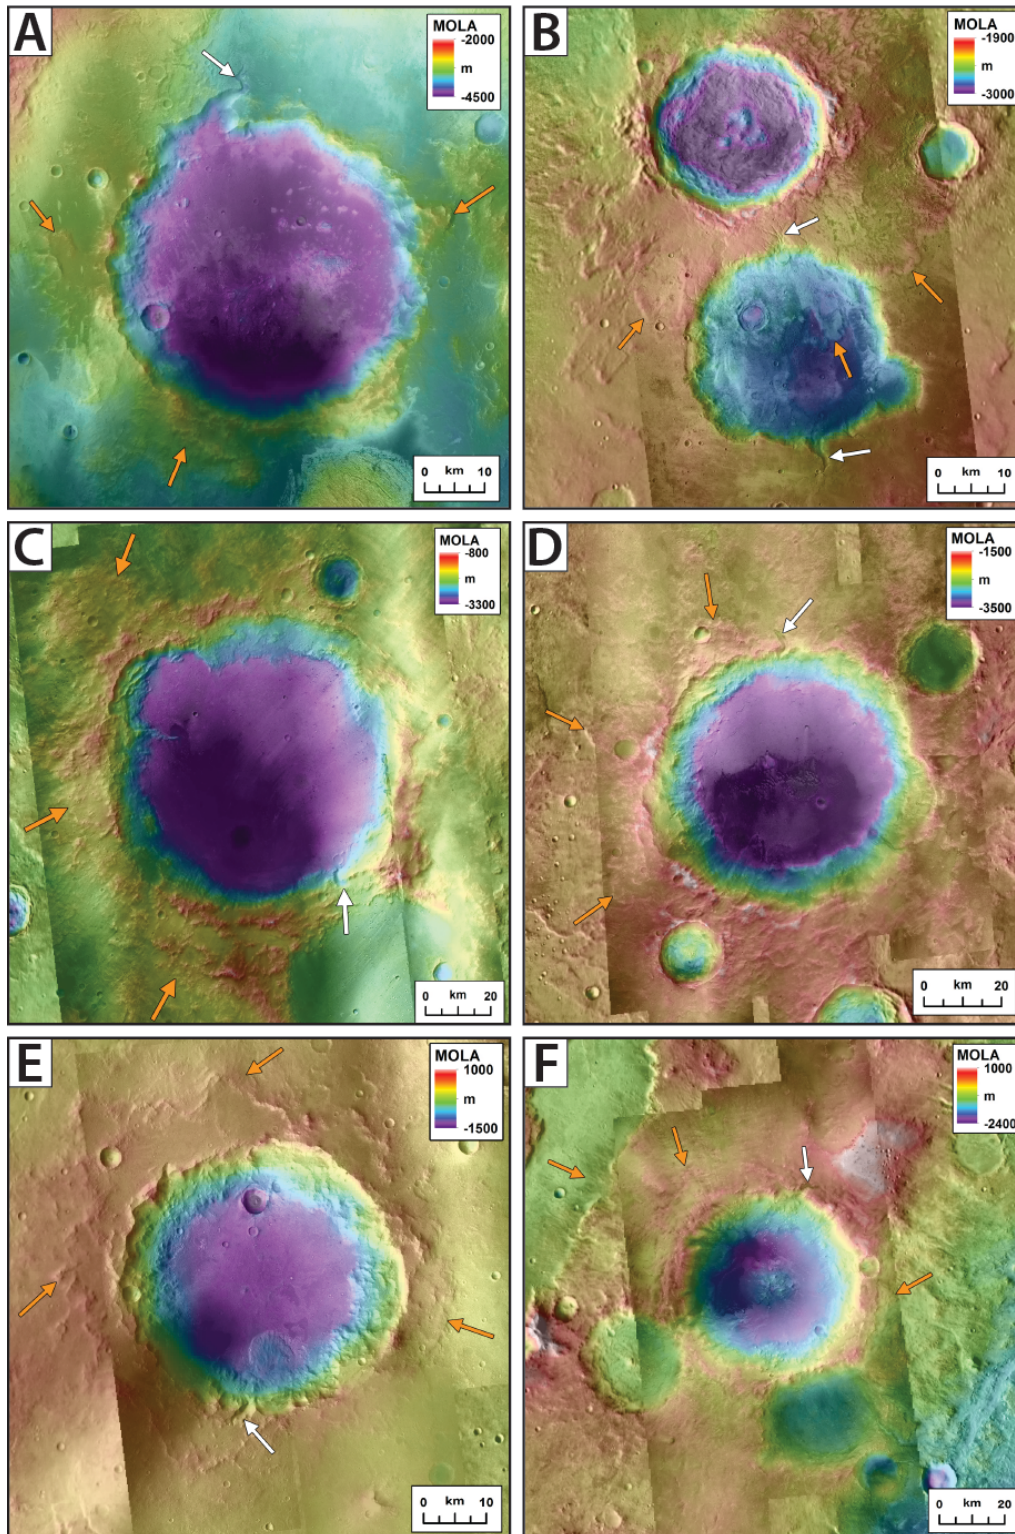

Figure DR4. Additional examples of closed-basin lakes with isolated inlet valleys (white arrows) hosted by, or crosscutting, impact craters with continuous ejecta deposits (orange arrows). **A:** Isolated inlet valley closed-basin lake at 22.1°N, -8.2°E. MOLA gridded topography overlain on a mosaic of CTX images P19\_008495\_2015, P17\_007704\_2014, P17\_007493\_2022, and P12\_005845\_2021. **B:** Isolated inlet valley closed-basin lake at



34.4°N, 3.2°E. MOLA gridded topography overlain on a mosaic of CTX images B18\_016749\_2126, B16\_015971\_2144, and B02\_010591\_2152 and the THEMIS ~100 m/pixel global daytime infrared mosaic. **C:** Isolated inlet valley closed-basin lake at 10.9°N, -14.0°E. MOLA gridded topography overlain on a mosaic of CTX images P22\_009761\_1897, P22\_009550\_1916, D01\_027457\_1902, B20\_017475\_1901, B08\_012596\_1930, B02\_010473\_1885, and B02\_010328\_1898 and the THEMIS ~100 m/pixel global daytime infrared mosaic. **D:** Isolated inlet valley closed-basin lake at 8.5°N, -15.8°E. MOLA gridded topography overlain on a mosaic of CTX images P19\_008614\_1892, P16\_007467\_1875, P12\_005542\_1864, D14\_032771\_1886, D08\_030490\_1890, and B11\_013796\_1898 and the THEMIS ~100 m/pixel global daytime infrared mosaic. **E:** Isolated inlet valley closed-basin lake at 7.0°N, -53.5°E. MOLA gridded topography overlain on a mosaic of CTX images B10\_013626\_1882, G14\_023753\_1841, G04\_019784\_1869, and B07\_012281\_1881 and the THEMIS ~100 m/pixel global daytime infrared mosaic. **F:** Isolated inlet valley closed-basin lake at 20.7°N, 75.8°E. MOLA gridded topography overlain on a mosaic of CTX images P15\_006778\_2002, D15\_033137\_1996, and B02\_010272\_2009 and the THEMIS ~100 m/pixel global daytime infrared mosaic.

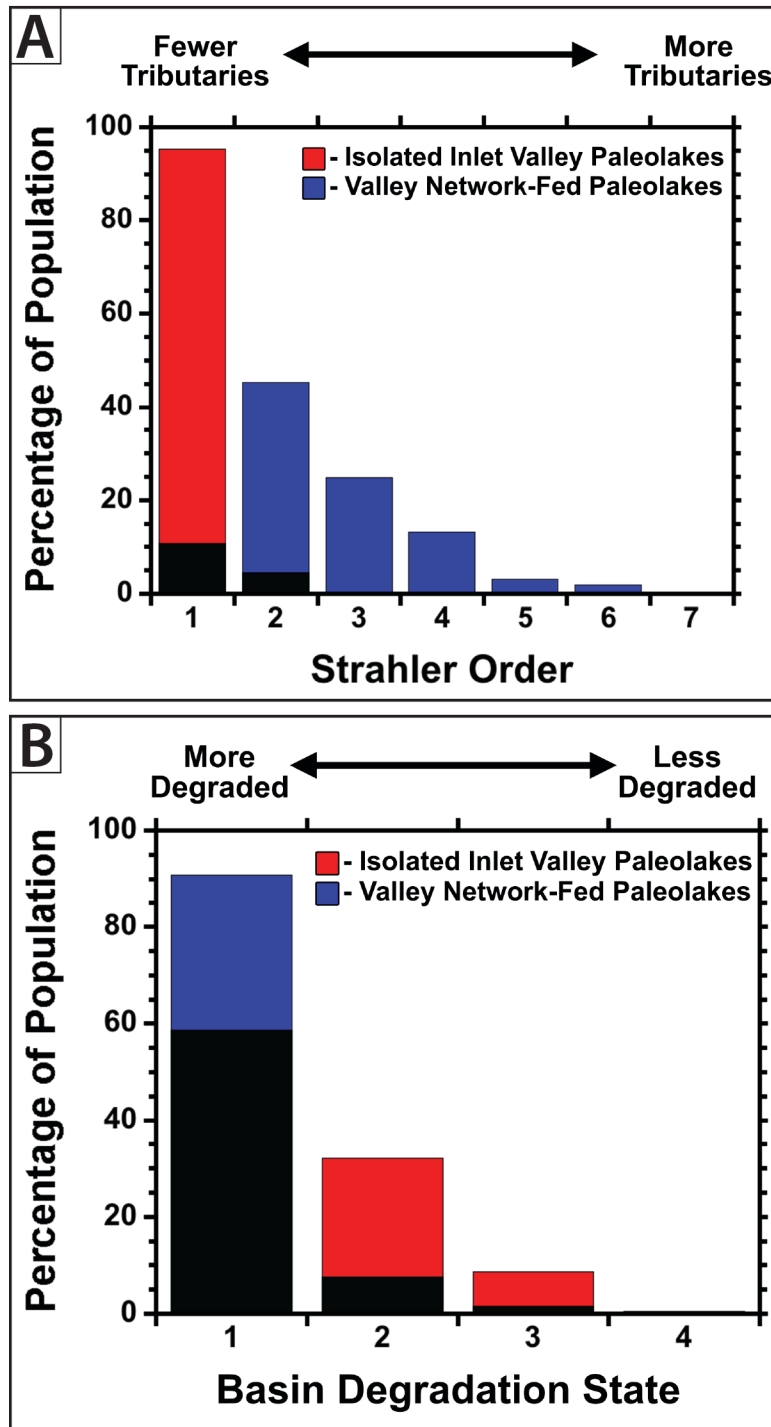

Figure DR5. **A:** Histogram of associated valley Strahler order for isolated inlet valley paleolakes (red) and valley network-fed paleolakes (blue). See also **Table DR1**. **B:** Histogram of host basin degradation state from Robbins and Hynek (2012) for isolated inlet valley paleolakes (red) and valley network-fed paleolakes (blue). Paleolakes not contained in impact craters classified by Robbins and Hynek (2012) are primarily contained within heavily degraded inter-crater basins, so are assigned a value of 1 for this histogram. See also **Table DR1**.

## TABLES

TABLE DR1. CATALOG OF STUDIED PALEOLAKES.

| Basin Type <sup>*</sup> | Basin # <sup>†</sup> | Lat. (°N) | Lon. (°E) | Valley Type <sup>§</sup> | Basin Degradation State <sup>#</sup> | Notes on Basin Degradation | Strahler Order | Notes on Strahler Order | Strahler Order Reference |
|-------------------------|----------------------|-----------|-----------|--------------------------|--------------------------------------|----------------------------|----------------|-------------------------|--------------------------|
| CBL                     | 1                    | 36.0      | -8.1      | II                       | 1                                    |                            | 1              |                         |                          |
| CBL                     | 2                    | 22.1      | -8.2      | II                       | 2                                    |                            | 1              |                         |                          |
| CBL                     | 3                    | 14.8      | -51.7     | II                       | 2                                    |                            | 1              |                         |                          |
| CBL                     | 4                    | 12.0      | -52.7     | II                       | 1                                    |                            | 1              |                         | Hynek et al., 2010       |
| CBL                     | 5                    | 10.2      | -16.6     | II                       | 2                                    |                            | 1              |                         | Hynek et al., 2010       |
| CBL                     | 6                    | 7.1       | 38.5      | VN                       | 1                                    |                            | 2              |                         | Hynek et al., 2010       |
| CBL                     | 7                    | 5.3       | -58.6     | VN                       | 3                                    |                            | 2              |                         | Hynek et al., 2010       |
| CBL                     | 8                    | -3.3      | 88.3      | VN                       | 1                                    |                            | 4              |                         | Hynek et al., 2010       |
| CBL                     | 9                    | -5.8      | 42.8      | VN                       | 1                                    |                            | 2              |                         | Hynek et al., 2010       |
| CBL                     | 10                   | -5.9      | -149.5    | II                       | 1                                    |                            | 1              |                         | Hynek et al., 2010       |
| CBL                     | 11                   | -7.0      | 31.8      | II                       | 1                                    |                            | 1              |                         |                          |
| CBL                     | 12                   | -7.8      | 25.3      | II                       | 2                                    |                            | 1              |                         | Hynek et al., 2010       |
| CBL                     | 13                   | -8.3      | 128.7     | VN                       | 1                                    |                            | 6              |                         | Hynek et al., 2010       |
| CBL                     | 14                   | -9.7      | 129.4     | VN                       | 2                                    |                            | 3              |                         | Hynek et al., 2010       |
| CBL                     | 15                   | -13.3     | 176.6     | VN                       | 1                                    |                            | 2              |                         | Hynek et al., 2010       |

|     |    |       |       |    |   |                                                   |   |  |                    |
|-----|----|-------|-------|----|---|---------------------------------------------------|---|--|--------------------|
| CBL | 16 | -13.8 | 142.5 | II | 1 |                                                   | 1 |  | Hynek et al., 2010 |
| CBL | 17 | -15.2 | 61.3  | VN | 1 |                                                   | 2 |  | Hynek et al., 2010 |
| CBL | 18 | -18.8 | 59.2  | VN | 2 |                                                   | 3 |  | Hynek et al., 2010 |
| CBL | 19 | -19.4 | 52.0  | VN | 1 |                                                   | 2 |  | Hynek et al., 2010 |
| CBL | 20 | -20.2 | 172.0 | II | 2 |                                                   | 1 |  |                    |
| CBL | 21 | 55.0  | -84.4 | II | 3 |                                                   | 1 |  |                    |
| CBL | 22 | 47.5  | -68.7 | VN | 1 |                                                   | 2 |  | Hynek et al., 2010 |
| CBL | 23 | 44.2  | -57.1 | II | 1 |                                                   | 1 |  | Hynek et al., 2010 |
| CBL | 24 | 41.1  | -2.9  | II | 3 |                                                   | 1 |  | Hynek et al., 2010 |
| CBL | 25 | 38.0  | 38.0  | II | 1 |                                                   | 1 |  |                    |
| CBL | 26 | 38.4  | 47.4  | VN | 1 |                                                   | 2 |  |                    |
| CBL | 27 | 37.9  | 54.6  | VN | 1 |                                                   | 2 |  |                    |
| CBL | 28 | 37.1  | 12.5  | II | 1 |                                                   | 1 |  |                    |
| CBL | 29 | 35.8  | -12.1 | II | 1 |                                                   | 1 |  |                    |
| CBL | 30 | 35.7  | -55.2 | II | 1 |                                                   | 1 |  |                    |
| CBL | 31 | 36.0  | 141.8 | II | 2 |                                                   | 1 |  |                    |
| CBL | 32 | 34.7  | 137.4 | II | 1 |                                                   | 1 |  |                    |
| CBL | 33 | 34.7  | -55.3 | II | 1 |                                                   | 1 |  |                    |
| CBL | 34 | 33.3  | -54.7 | II | 1 |                                                   | 1 |  |                    |
| CBL | 35 | 33.1  | -9.2  | II | 1 |                                                   | 1 |  |                    |
| CBL | 36 | 34.4  | 3.2   | II | 1 | Basin is more heavily degraded than inlet valley. | 1 |  |                    |

|     |    |      |        |    |   |                       |   |                                                                                                  |                    |
|-----|----|------|--------|----|---|-----------------------|---|--------------------------------------------------------------------------------------------------|--------------------|
| CBL | 37 | 33.6 | 37.9   | VN | 1 |                       | 2 |                                                                                                  | Hynek et al., 2010 |
| CBL | 38 | 32.2 | 52.0   | II | 1 |                       | 1 |                                                                                                  | Hynek et al., 2010 |
| CBL | 39 | 32.3 | 40.1   | II | 1 |                       | 1 |                                                                                                  |                    |
| CBL | 40 | 31.6 | -5.7   | II | 2 |                       | 1 |                                                                                                  |                    |
| CBL | 41 | 29.1 | 17.1   | II | 1 |                       | 1 |                                                                                                  |                    |
| CBL | 42 | 29.6 | 56.5   | II | 1 |                       | 1 |                                                                                                  |                    |
| CBL | 43 | 26.5 | 43.9   | II | 2 |                       | 1 |                                                                                                  |                    |
| CBL | 44 | 26.2 | 37.5   | II | 2 |                       | 1 |                                                                                                  |                    |
| CBL | 45 | 26.2 | 24.1   | II | 2 |                       | 1 |                                                                                                  |                    |
| CBL | 46 | 27.1 | 21.4   | II | 2 |                       | 1 |                                                                                                  | Hynek et al., 2010 |
| CBL | 47 | 26.5 | 19.1   | II | 2 |                       | 1 |                                                                                                  |                    |
| CBL | 48 | 26.1 | 10.0   | II | 2 |                       | 1 |                                                                                                  | Hynek et al., 2010 |
| CBL | 49 | 27.7 | -124.5 | II | 3 |                       | 1 |                                                                                                  |                    |
| CBL | 50 | 25.1 | -97.5  | II | 3 |                       | 2 | Valley formation associated with geothermal heat from Ceraunius Tholus (Fassett and Head, 2007). | Hynek et al., 2010 |
| CBL | 51 | 31.4 | -12.9  | II | 3 |                       | 1 |                                                                                                  | Hynek et al., 2010 |
| CBL | 52 | 26.3 | -7.8   | II | 1 |                       | 1 |                                                                                                  |                    |
| CBL | 53 | 23.8 | 42.0   | II | 1 |                       | 1 |                                                                                                  |                    |
| CBL | 54 | 21.4 | 58.1   | II | 2 |                       | 1 |                                                                                                  |                    |
| CBL | 55 | 21.4 | 37.8   | II | 2 |                       | 1 |                                                                                                  |                    |
| CBL | 56 | 20.4 | -20.9  | II | 1 |                       | 1 |                                                                                                  |                    |
| CBL | 57 | 18.1 | -23.0  | II | 1 | Basin is more heavily | 1 |                                                                                                  |                    |

|     |    |      |       |    |   |                                                   |   |  |                    |
|-----|----|------|-------|----|---|---------------------------------------------------|---|--|--------------------|
|     |    |      |       |    |   | degraded than inlet valley.                       |   |  |                    |
| CBL | 58 | 19.2 | -18.6 | II | 1 |                                                   | 1 |  |                    |
| CBL | 59 | 17.7 | 3.8   | VN | 1 |                                                   | 2 |  | Hynek et al., 2010 |
| CBL | 60 | 19.0 | 4.9   | II | 2 |                                                   | 1 |  |                    |
| CBL | 61 | 19.9 | 12.0  | II | 2 |                                                   | 2 |  | Hynek et al., 2010 |
| CBL | 62 | 16.7 | 26.9  | II | 1 |                                                   | 1 |  |                    |
| CBL | 63 | 16.2 | -53.2 | II | 2 |                                                   | 1 |  | Hynek et al., 2010 |
| CBL | 64 | 14.3 | -24.4 | II | 1 | Basin is more heavily degraded than inlet valley. | 1 |  |                    |
| CBL | 65 | 13.0 | -14.2 | II | 1 |                                                   | 1 |  |                    |
| CBL | 66 | 13.2 | 9.2   | II | 3 |                                                   | 2 |  |                    |
| CBL | 67 | 12.8 | 56.4  | II | 1 |                                                   | 1 |  |                    |
| CBL | 68 | 10.6 | 39.5  | VN | 1 |                                                   | 2 |  | Hynek et al., 2010 |
| CBL | 69 | 10.9 | -14.0 | II | 2 |                                                   | 1 |  |                    |
| CBL | 70 | 12.5 | -49.0 | II | 1 | Basin is more heavily degraded than inlet valley. | 1 |  |                    |
| CBL | 71 | 11.6 | -51.3 | II | 2 |                                                   | 1 |  |                    |
| CBL | 72 | 8.4  | -56.9 | II | 1 |                                                   | 1 |  |                    |
| CBL | 73 | 8.2  | -49.3 | II | 2 |                                                   | 1 |  |                    |
| CBL | 74 | 9.9  | -46.6 | II | 3 |                                                   | 1 |  |                    |
| CBL | 75 | 7.8  | -39.1 | II | 2 |                                                   | 1 |  |                    |
| CBL | 76 | 8.0  | -26.2 | II | 1 |                                                   | 1 |  | Hynek et al., 2010 |
| CBL | 77 | 8.5  | -15.8 | II | 2 |                                                   | 1 |  |                    |
| CBL | 78 | 5.8  | 107.4 | II | 2 |                                                   | 1 |  |                    |

|     |     |      |       |    |   |  |   |                                               |                    |
|-----|-----|------|-------|----|---|--|---|-----------------------------------------------|--------------------|
| CBL | 79  | 7.0  | 106.8 | II | 2 |  | 1 |                                               |                    |
| CBL | 80  | 5.0  | 28.2  | II | 1 |  | 1 |                                               |                    |
| CBL | 81  | 5.1  | -50.8 | II | 1 |  | 1 |                                               |                    |
| CBL | 82  | 7.0  | -53.5 | II | 3 |  | 1 |                                               |                    |
| CBL | 83  | 2.4  | -51.6 | II | 3 |  | 2 | Inlet valley has only very minor tributaries. |                    |
| CBL | 84  | 4.1  | -40.5 | II | 1 |  | 1 |                                               |                    |
| CBL | 85  | 3.5  | -40.2 | II | 1 |  | 1 |                                               |                    |
| CBL | 86  | 4.0  | -38.6 | II | 1 |  | 1 |                                               |                    |
| CBL | 87  | 3.1  | 35.2  | VN | 1 |  | 2 |                                               |                    |
| CBL | 88  | 3.9  | 33.3  | II | 1 |  | 1 |                                               |                    |
| CBL | 89  | 3.0  | 45.5  | VN | 1 |  | 2 |                                               | Hynek et al., 2010 |
| CBL | 90  | 3.2  | 101.4 | II | 2 |  | 1 |                                               |                    |
| CBL | 91  | 3.7  | 113.5 | II | 3 |  | 1 |                                               |                    |
| CBL | 92  | 1.5  | 116.3 | II | 4 |  | 1 |                                               |                    |
| CBL | 93  | -1.7 | -49.2 | II | 1 |  | 1 |                                               |                    |
| CBL | 94  | -1.4 | -39.7 | II | 2 |  | 2 | Inlet valley has only very minor tributaries. | Hynek et al., 2010 |
| CBL | 95  | -1.4 | -36.9 | II | 2 |  | 1 |                                               |                    |
| CBL | 96  | -2.9 | 67.7  | II | 2 |  | 1 |                                               |                    |
| CBL | 97  | -5.2 | 137.8 | VN | 2 |  | 4 |                                               | Hynek et al., 2010 |
| CBL | 98  | -6.3 | 40.6  | II | 1 |  | 1 |                                               |                    |
| CBL | 99  | -4.8 | 2.0   | II | 2 |  | 1 |                                               | Hynek et al., 2010 |
| CBL | 100 | -6.3 | -4.4  | II | 1 |  | 1 |                                               |                    |
| CBL | 101 | -9.3 | -     | II | 1 |  | 1 |                                               |                    |
| CBL | 102 | -8.2 | -     | II | 1 |  | 1 |                                               |                    |

|     |     |       |            |    |   |                                                                                                                            |   |  |                       |
|-----|-----|-------|------------|----|---|----------------------------------------------------------------------------------------------------------------------------|---|--|-----------------------|
| CBL | 103 | -9.9  | -<br>158.1 | II | 2 |                                                                                                                            | 1 |  |                       |
| CBL | 104 | -9.5  | -<br>148.0 | II | 1 |                                                                                                                            | 1 |  |                       |
| CBL | 105 | -7.7  | -<br>146.6 | II | 1 |                                                                                                                            | 1 |  |                       |
| CBL | 106 | -10.0 | -53.7      | II | 2 |                                                                                                                            | 1 |  |                       |
| CBL | 107 | -9.6  | -11.1      | II | 2 |                                                                                                                            | 1 |  |                       |
| CBL | 108 | -8.2  | 3.0        | II | 1 |                                                                                                                            | 1 |  |                       |
| CBL | 109 | -7.8  | 30.4       | II | 1 |                                                                                                                            | 1 |  |                       |
| CBL | 110 | -9.0  | 38.1       | II | 1 |                                                                                                                            | 1 |  |                       |
| CBL | 111 | -9.6  | 144.1      | II | 3 |                                                                                                                            | 1 |  | Hynek et al.,<br>2010 |
| CBL | 112 | -9.4  | 148.8      | II | 2 |                                                                                                                            | 1 |  | Hynek et al.,<br>2010 |
| CBL | 113 | -10.6 | 139.7      | II | 2 |                                                                                                                            | 1 |  | Hynek et al.,<br>2010 |
| CBL | 114 | -10.8 | 136.4      | II | 1 |                                                                                                                            | 1 |  |                       |
| CBL | 115 | -11.3 | 131.4      | VN | 2 | Level of basin<br>degradation is more<br>consistent with a<br>Robbins and Hynek<br>(2012) basin degradation<br>state of 1. | 2 |  | Hynek et al.,<br>2010 |
| CBL | 116 | -11.5 | 124.6      | II | 1 |                                                                                                                            | 1 |  |                       |
| CBL | 117 | -12.0 | 123.7      | II | 1 |                                                                                                                            | 1 |  |                       |
| CBL | 118 | -10.8 | 91.2       | II | 2 |                                                                                                                            | 1 |  |                       |
| CBL | 119 | -11.1 | 18.8       | II | 1 |                                                                                                                            | 1 |  |                       |
| CBL | 120 | -11.6 | 16.5       | II | 1 |                                                                                                                            | 1 |  | Hynek et al.,<br>2010 |
| CBL | 121 | -11.6 | 12.0       | II | 2 |                                                                                                                            | 1 |  |                       |
| CBL | 122 | -12.2 | -17.0      | II | 1 |                                                                                                                            | 1 |  |                       |



|     |     |       |            |    |   |                                                                                                             |   |  |                    |
|-----|-----|-------|------------|----|---|-------------------------------------------------------------------------------------------------------------|---|--|--------------------|
| CBL | 123 | -12.1 | -<br>163.4 | II | 2 |                                                                                                             | 1 |  |                    |
| CBL | 124 | -13.7 | 6.8        | II | 1 |                                                                                                             | 1 |  |                    |
| CBL | 125 | -13.9 | 40.4       | II | 1 |                                                                                                             | 1 |  |                    |
| CBL | 126 | -13.3 | 50.5       | VN | 2 |                                                                                                             | 3 |  |                    |
| CBL | 127 | -13.9 | 78.5       | II | 2 |                                                                                                             | 1 |  |                    |
| CBL | 128 | -13.8 | 99.1       | II | 1 |                                                                                                             | 1 |  |                    |
| CBL | 129 | -13.4 | 124.9      | II | 1 |                                                                                                             | 1 |  |                    |
| CBL | 130 | -16.7 | 169.4      | II | 2 |                                                                                                             | 1 |  |                    |
| CBL | 131 | -15.6 | 79.3       | II | 1 |                                                                                                             | 1 |  |                    |
| CBL | 132 | -16.2 | 45.9       | VN | 1 |                                                                                                             | 2 |  |                    |
| CBL | 133 | -16.9 | 45.9       | II | 2 |                                                                                                             | 1 |  |                    |
| CBL | 134 | -17.5 | 44.9       | II | 1 |                                                                                                             | 1 |  |                    |
| CBL | 135 | -16.7 | 28.9       | II | 1 |                                                                                                             | 1 |  |                    |
| CBL | 136 | -16.5 | 25.7       | II | 1 |                                                                                                             | 1 |  |                    |
| CBL | 137 | -16.9 | -37.8      | II | 1 |                                                                                                             | 1 |  |                    |
| CBL | 138 | -15.5 | -<br>155.5 | II | 2 |                                                                                                             | 1 |  |                    |
| CBL | 139 | -19.5 | -13.3      | II | 1 |                                                                                                             | 1 |  |                    |
| CBL | 140 | -19.9 | -2.9       | II | 1 |                                                                                                             | 1 |  |                    |
| CBL | 141 | -19.6 | 46.2       | II | 2 |                                                                                                             | 2 |  |                    |
| CBL | 142 | -19.4 | 53.8       | VN | 3 | Level of basin degradation is more consistent with a Robbins and Hynek (2012) basin degradation state of 2. | 3 |  | Hynek et al., 2010 |
| CBL | 143 | -19.7 | 75.7       | VN | 1 |                                                                                                             | 3 |  | Hynek et al., 2010 |
| CBL | 144 | -18.2 | 79.8       | II | 1 |                                                                                                             | 1 |  |                    |

|     |     |       |       |    |   |                                                                                                             |   |  |                    |
|-----|-----|-------|-------|----|---|-------------------------------------------------------------------------------------------------------------|---|--|--------------------|
| CBL | 145 | -19.6 | 84.3  | II | 2 |                                                                                                             | 1 |  |                    |
| CBL | 146 | -20.4 | 176.9 | II | 1 |                                                                                                             | 1 |  |                    |
| CBL | 147 | -21.8 | 162.7 | VN | 1 |                                                                                                             | 2 |  |                    |
| CBL | 148 | -20.5 | 47.4  | II | 1 |                                                                                                             | 1 |  | Hynek et al., 2010 |
| CBL | 149 | -22.6 | -56.6 | II | 2 |                                                                                                             | 1 |  | Hynek et al., 2010 |
| CBL | 150 | -23.4 | -     | II | 1 |                                                                                                             | 1 |  |                    |
| CBL | 151 | -24.2 | -44.9 | II | 1 |                                                                                                             | 1 |  |                    |
| CBL | 152 | -25.1 | -8.4  | II | 1 |                                                                                                             | 1 |  |                    |
| CBL | 153 | -23.8 | 52.6  | II | 3 |                                                                                                             | 1 |  |                    |
| CBL | 154 | -25.3 | 71.8  | II | 1 |                                                                                                             | 1 |  | Hynek et al., 2010 |
| CBL | 155 | -24.4 | 86.6  | II | 2 |                                                                                                             | 1 |  | Hynek et al., 2010 |
| CBL | 156 | -27.6 | 141.5 | II | 1 |                                                                                                             | 1 |  | Hynek et al., 2010 |
| CBL | 157 | -27.3 | 127.7 | VN | 1 |                                                                                                             | 3 |  | Hynek et al., 2010 |
| CBL | 158 | -25.7 | 97.5  | VN | 3 | Level of basin degradation is more consistent with a Robbins and Hynek (2012) basin degradation state of 1. | 3 |  | Hynek et al., 2010 |
| CBL | 159 | -27.4 | 67.5  | II | 1 |                                                                                                             | 1 |  |                    |
| CBL | 160 | -25.8 | -     | II | 1 |                                                                                                             | 1 |  |                    |
| CBL | 161 | -28.6 | -     | II | 1 |                                                                                                             | 1 |  |                    |
| CBL | 162 | -29.3 | -32.1 | II | 1 |                                                                                                             | 1 |  |                    |
| CBL | 163 | -28.8 | -6.6  | II | 1 |                                                                                                             | 1 |  | Hynek et al., 2010 |

|     |     |       |       |    |   |  |   |                                               |                    |
|-----|-----|-------|-------|----|---|--|---|-----------------------------------------------|--------------------|
| CBL | 164 | -29.0 | 139.1 | II | 1 |  | 1 |                                               |                    |
| CBL | 165 | -31.5 | 128.3 | VN | 1 |  | 2 |                                               | Hynek et al., 2010 |
| CBL | 166 | -30.9 | 35.8  | II | 1 |  | 1 |                                               |                    |
| CBL | 167 | -30.1 | 32.5  | II | 1 |  | 1 |                                               |                    |
| CBL | 168 | -31.3 | 20.1  | II | 1 |  | 1 |                                               |                    |
| CBL | 169 | -32.5 | 10.6  | II | 1 |  | 2 | Inlet valley has only very minor tributaries. | Hynek et al., 2010 |
| CBL | 170 | -31.4 | -10.9 | II | 1 |  | 1 |                                               |                    |
| CBL | 171 | -31.5 | -20.3 | II | 1 |  | 1 |                                               |                    |
| CBL | 172 | -32.0 | -22.2 | II | 1 |  | 1 |                                               |                    |
| CBL | 173 | -30.7 | -     | II | 1 |  | 1 |                                               |                    |
| CBL | 174 | -33.8 | -48.6 | II | 1 |  | 1 |                                               | Hynek et al., 2010 |
| CBL | 175 | -34.9 | -48.0 | II | 1 |  | 1 |                                               | Hynek et al., 2010 |
| CBL | 176 | -33.2 | -32.4 | II | 1 |  | 1 |                                               |                    |
| CBL | 177 | -34.6 | -31.9 | II | 1 |  | 1 |                                               |                    |
| CBL | 178 | -34.4 | -13.0 | II | 2 |  | 1 |                                               | Hynek et al., 2010 |
| CBL | 179 | -34.3 | 15.2  | II | 2 |  | 1 |                                               |                    |
| CBL | 180 | -34.2 | 18.2  | II | 2 |  | 1 |                                               |                    |
| CBL | 181 | -33.9 | 45.3  | II | 2 |  | 1 |                                               |                    |
| CBL | 182 | -33.6 | 48.1  | II | 2 |  | 1 |                                               |                    |
| CBL | 183 | -37.7 | 37.5  | II | 1 |  | 1 |                                               |                    |
| CBL | 184 | -37.4 | 10.5  | II | 1 |  | 1 |                                               |                    |
| CBL | 185 | -36.4 | -7.5  | II | 1 |  | 1 |                                               |                    |
| CBL | 186 | -37.9 | -69.1 | II | 2 |  | 1 |                                               |                    |
| CBL | 187 | -36.6 | -72.8 | II | 1 |  | 1 |                                               | Hynek et al., 2010 |

|     |     |       |       |    |     |                                                                    |   |                                        |                    |
|-----|-----|-------|-------|----|-----|--------------------------------------------------------------------|---|----------------------------------------|--------------------|
| CBL | 188 | -39.5 | -12.6 | II | 1   |                                                                    | 1 |                                        | Hynek et al., 2010 |
| CBL | 189 | -39.1 | 23.9  | II | 2   |                                                                    | 1 |                                        |                    |
| CBL | 190 | -40.7 | 43.6  | II | 2   |                                                                    | 1 |                                        | Hynek et al., 2010 |
| CBL | 191 | -41.5 | -0.5  | II | 1   |                                                                    | 1 |                                        |                    |
| CBL | 192 | -41.3 | -62.5 | II | 2   |                                                                    | 2 |                                        | Hynek et al., 2010 |
| CBL | 193 | -41.4 | -76.3 | II | 2   |                                                                    | 1 |                                        |                    |
| CBL | 194 | -42.5 | -     | II | 1   |                                                                    | 1 |                                        |                    |
| CBL | 195 | -45.3 | 122.8 | II | 1   |                                                                    | 1 |                                        |                    |
| CBL | 196 | -46.3 | -     | II | 1   |                                                                    | 1 |                                        |                    |
| CBL | 197 | -48.3 | -13.2 | II | 1   |                                                                    | 1 |                                        | Hynek et al., 2010 |
| CBL | 198 | -54.4 | -     | II | 1   |                                                                    | 1 |                                        |                    |
| CBL | 199 | 22.1  | 66.8  | II | 3   |                                                                    | 1 |                                        |                    |
| CBL | 200 | -9.9  | 144.5 | VN | 1   |                                                                    | 2 |                                        | Hynek et al., 2010 |
| CBL | 201 | -12.0 | 125.1 | II | 1   |                                                                    | 1 |                                        |                    |
| CBL | 202 | -37.5 | -     | II | 3   |                                                                    | 1 |                                        |                    |
| CBL | 203 | -24.0 | -33.3 | VN | 1   |                                                                    | 3 |                                        |                    |
| CBL | 204 | -26.0 | -34.0 | VN | 2   |                                                                    | 4 |                                        | Hynek et al., 2010 |
| CBL | 205 | 20.7  | 75.8  | II | 3   |                                                                    | 1 |                                        |                    |
| OBL | 1   | 1.5   | 116.9 | VN | N/A | Paleolake is contained within a heavily eroded inter-crater basin. | 3 |                                        | Hynek et al., 2010 |
| OBL | 2   | -9.3  | 151.8 | VN | 1   |                                                                    | 3 | Value taken from outlet valley system. |                    |
| OBL | 3   | -15.2 | 166.8 | VN | N/A | Paleolake is contained                                             | 2 |                                        | Hynek et al.,      |

|     |    |       |            |    |     |                                                                                                             |     |                                                                     |                    |
|-----|----|-------|------------|----|-----|-------------------------------------------------------------------------------------------------------------|-----|---------------------------------------------------------------------|--------------------|
|     |    |       |            |    |     | within a heavily eroded inter-crater basin.                                                                 |     |                                                                     | 2010               |
| OBL | 4  | -14.6 | -<br>174.9 | VN | 1   |                                                                                                             | 2   |                                                                     | Hynek et al., 2010 |
| OBL | 5  | -10.3 | -<br>161.6 | VN | 2   | Level of basin degradation is more consistent with a Robbins and Hynek (2012) basin degradation state of 1. | 4   |                                                                     | Hynek et al., 2010 |
| OBL | 6  | -11.5 | 152.8      | VN | 1   |                                                                                                             | 2   |                                                                     | Hynek et al., 2010 |
| OBL | 7  | -12.4 | 157.1      | VN | 1   |                                                                                                             | 5   |                                                                     | Hynek et al., 2010 |
| OBL | 8  | 18.3  | 42.2       | VN | N/A | Paleolake is contained within a heavily eroded inter-crater basin.                                          | 4   | Value taken from outlet valley system.                              | Hynek et al., 2010 |
| OBL | 9  | 27.5  | 59.7       | VN | N/A | Paleolake is contained within a heavily eroded inter-crater basin.                                          | 3   | Value taken from outlet valley system.                              | Hynek et al., 2010 |
| OBL | 10 | 21.1  | 60.9       | VN | 1   |                                                                                                             | N/A | Insufficient image coverage to confidently assign a Strahler order. |                    |
| OBL | 11 | 26.6  | 63.0       | VN | 1   |                                                                                                             | 1   | Paleolake is directly fed by the outlet of open-basin lake #10.     |                    |
| OBL | 12 | -1.3  | 101.0      | VN | N/A | Paleolake is contained within a heavily degraded crater not mapped by Robbins and Hynek (2012).             | 3   |                                                                     | Hynek et al., 2010 |
| OBL | 13 | 0.9   | 102.0      | VN | N/A | Paleolake is contained within a heavily eroded inter-crater basin.                                          | 3   |                                                                     | Hynek et al., 2010 |
| OBL | 14 | 2.4   | 102.4      | VN | N/A | Paleolake is contained within a heavily eroded inter-crater basin.                                          | 2   |                                                                     | Hynek et al., 2010 |

|     |    |       |        |    |     |                                                                                                 |   |                                        |                    |
|-----|----|-------|--------|----|-----|-------------------------------------------------------------------------------------------------|---|----------------------------------------|--------------------|
| OBL | 15 | -18.3 | -169.2 | VN | 1   |                                                                                                 | 3 | Value taken from outlet valley system. | Hynek et al., 2010 |
| OBL | 16 | -21.7 | -12.3  | VN | N/A | Paleolake is contained within a heavily degraded crater not mapped by Robbins and Hynek (2012). | 6 |                                        | Hynek et al., 2010 |
| OBL | 17 | 25.6  | -8.6   | VN | 1   |                                                                                                 | 2 |                                        | Hynek et al., 2010 |
| OBL | 18 | -8.8  | -7.2   | VN | 1   |                                                                                                 | 3 |                                        | Hynek et al., 2010 |
| OBL | 19 | -10.6 | 2.8    | VN | 1   |                                                                                                 | 5 |                                        | Hynek et al., 2010 |
| OBL | 20 | 31.3  | 60.1   | VN | 1   |                                                                                                 | 2 |                                        | Hynek et al., 2010 |
| OBL | 21 | 30.9  | 63.0   | VN | 1   |                                                                                                 | 3 | Value taken from outlet valley system. | Hynek et al., 2010 |
| OBL | 22 | -3.7  | 78.4   | VN | N/A | Paleolake is contained within a heavily eroded inter-crater basin.                              | 2 | Value taken from outlet valley system. | Hynek et al., 2010 |
| OBL | 23 | -2.4  | 85.0   | VN | N/A | Paleolake is contained within a heavily eroded inter-crater basin.                              | 4 |                                        | Hynek et al., 2010 |
| OBL | 24 | -4.5  | 85.0   | VN | N/A | Paleolake is contained within a heavily eroded inter-crater basin.                              | 2 |                                        |                    |
| OBL | 25 | -0.1  | 89.7   | VN | 1   |                                                                                                 | 2 |                                        | Hynek et al., 2010 |
| OBL | 26 | -4.6  | 90.0   | VN | 1   |                                                                                                 | 5 |                                        | Hynek et al., 2010 |
| OBL | 27 | -2.8  | 108.2  | VN | 1   |                                                                                                 | 3 |                                        | Hynek et al., 2010 |
| OBL | 28 | -4.0  | 109.2  | VN | 1   |                                                                                                 | 3 | Value taken from outlet valley system. | Hynek et al., 2010 |
| OBL | 29 | -2.7  | 110.9  | VN | 1   |                                                                                                 | 4 |                                        | Hynek et al., 2010 |

|     |    |       |       |    |     |                                                                    |   |                                                                   |                    |
|-----|----|-------|-------|----|-----|--------------------------------------------------------------------|---|-------------------------------------------------------------------|--------------------|
| OBL | 30 | -11.7 | 144.1 | VN | 1   |                                                                    | 2 |                                                                   | Hynek et al., 2010 |
| OBL | 31 | -10.8 | 154.5 | VN | 1   |                                                                    | 1 | Inlet valley is clearly buried by younger material.               | Hynek et al., 2010 |
| OBL | 32 | -23.1 | -23.5 | VN | 1   |                                                                    | 2 |                                                                   | Hynek et al., 2010 |
| OBL | 33 | -5.5  | -5.3  | VN | 1   |                                                                    | 2 |                                                                   | Hynek et al., 2010 |
| OBL | 34 | -3.4  | 102.3 | VN | N/A | Paleolake is contained within a heavily eroded inter-crater basin. | 3 | Inlet valleys are heavily eroded/modified, so value is uncertain. |                    |
| OBL | 35 | -27.9 | 3.9   | VN | N/A | Paleolake is contained within a heavily eroded inter-crater basin. | 4 | Value taken from outlet valley system.                            | Hynek et al., 2010 |
| OBL | 36 | 13.2  | 31.0  | VN | N/A | Paleolake is contained within a heavily eroded inter-crater basin. | 3 |                                                                   | Hynek et al., 2010 |
| OBL | 37 | 10.0  | 31.6  | VN | N/A | Paleolake is contained within a heavily eroded inter-crater basin. | 6 |                                                                   | Hynek et al., 2010 |
| OBL | 38 | 1.3   | 35.5  | VN | 1   |                                                                    | 4 |                                                                   | Hynek et al., 2010 |
| OBL | 39 | -6.4  | 42.0  | VN | 1   |                                                                    | 4 |                                                                   | Hynek et al., 2010 |
| OBL | 40 | 29.9  | 25.6  | VN | 1   |                                                                    | 1 | Paleolake is directly fed by the outlet of open-basin lake #117.  | Hynek et al., 2010 |
| OBL | 41 | 24.4  | 31.7  | VN | 1   |                                                                    | 2 | Inlet valleys are heavily eroded/modified, so value is uncertain. | Hynek et al., 2010 |
| OBL | 42 | 20.0  | 36.4  | VN | 1   |                                                                    | 4 |                                                                   | Hynek et al., 2010 |
| OBL | 43 | 19.0  | 35.1  | VN | 1   |                                                                    | 2 |                                                                   | Hynek et al., 2010 |
| OBL | 44 | 16.7  | 33.6  | VN | N/A | Paleolake is contained                                             | 3 |                                                                   |                    |

|     |    |       |            |    |     |                                                                                                 |   |                                                     |                    |
|-----|----|-------|------------|----|-----|-------------------------------------------------------------------------------------------------|---|-----------------------------------------------------|--------------------|
|     |    |       |            |    |     | within a heavily eroded inter-crater basin.                                                     |   |                                                     |                    |
| OBL | 45 | 18.4  | 77.7       | VN | 1   |                                                                                                 | 3 |                                                     | Schon et al., 2012 |
| OBL | 46 | -10.3 | 127.2      | VN | N/A | Paleolake is contained within a heavily degraded crater not mapped by Robbins and Hynek (2012). | 3 |                                                     | Hynek et al., 2010 |
| OBL | 47 | -10.4 | 128.0      | VN | 1   |                                                                                                 | 3 |                                                     | Hynek et al., 2010 |
| OBL | 48 | -7.3  | 131.1      | VN | 1   |                                                                                                 | 3 |                                                     | Hynek et al., 2010 |
| OBL | 49 | -4.6  | 127.1      | VN | 1   |                                                                                                 | 5 |                                                     | Hynek et al., 2010 |
| OBL | 50 | -14.4 | 175.4      | VN | 1   |                                                                                                 | 5 |                                                     | Hynek et al., 2010 |
| OBL | 51 | -30.1 | 176.6      | VN | N/A | Paleolake is contained within a heavily eroded inter-crater basin.                              | 3 |                                                     | Hynek et al., 2010 |
| OBL | 52 | 8.5   | -48.0      | VN | 1   |                                                                                                 | 3 |                                                     | Hynek et al., 2010 |
| OBL | 53 | 33.8  | 17.1       | VN | 1   |                                                                                                 | 3 |                                                     | Hynek et al., 2010 |
| OBL | 54 | 34.6  | 18.2       | VN | 1   |                                                                                                 | 2 |                                                     | Hynek et al., 2010 |
| OBL | 55 | 34.2  | 18.0       | VN | 1   |                                                                                                 | 2 |                                                     | Hynek et al., 2010 |
| OBL | 56 | -12.1 | -<br>155.8 | VN | 1   |                                                                                                 | 1 | Inlet valley is clearly buried by younger material. | Hynek et al., 2010 |
| OBL | 57 | -15.4 | -<br>158.6 | VN | N/A | Paleolake is contained within a heavily eroded inter-crater basin.                              | 2 |                                                     | Hynek et al., 2010 |
| OBL | 58 | 27.9  | 26.6       | VN | 1   |                                                                                                 | 1 | Inlet valley is clearly buried by younger           | Hynek et al., 2010 |



|     |    |       |        |    |     |                                                                    |   |                                                                   |                    |
|-----|----|-------|--------|----|-----|--------------------------------------------------------------------|---|-------------------------------------------------------------------|--------------------|
|     |    |       |        |    |     |                                                                    |   | material.                                                         |                    |
| OBL | 59 | -20.3 | 59.6   | VN | 1   |                                                                    | 3 | Inlet valleys are heavily eroded/modified, so value is uncertain. |                    |
| OBL | 60 | -21.0 | 60.6   | VN | 1   |                                                                    | 2 | Inlet valleys are heavily eroded/modified, so value is uncertain. |                    |
| OBL | 63 | -0.8  | 125.2  | VN | 1   |                                                                    | 4 |                                                                   | Hynek et al., 2010 |
| OBL | 64 | -1.6  | 126.6  | VN | 1   |                                                                    | 4 |                                                                   | Hynek et al., 2010 |
| OBL | 65 | -23.4 | -12.3  | VN | 1   |                                                                    | 2 |                                                                   | Hynek et al., 2010 |
| OBL | 66 | -19.4 | -6.3   | VN | 1   |                                                                    | 4 |                                                                   | Hynek et al., 2010 |
| OBL | 67 | -21.5 | 4.1    | VN | 1   |                                                                    | 2 |                                                                   | Hynek et al., 2010 |
| OBL | 68 | -10.3 | 151.4  | VN | N/A | Paleolake is contained within a heavily eroded inter-crater basin. | 1 | Value taken from outlet valley system.                            |                    |
| OBL | 69 | 27.3  | 61.4   | VN | 1   |                                                                    | 1 | Paleolake is directly fed by the outlet of open-basin lake #11.   |                    |
| OBL | 70 | -6.9  | 135.4  | VN | 1   |                                                                    | 3 |                                                                   | Hynek et al., 2010 |
| OBL | 71 | -6.7  | 136.5  | VN | N/A | Paleolake is contained within a heavily eroded inter-crater basin. | 4 |                                                                   | Hynek et al., 2010 |
| OBL | 72 | -9.4  | 134.9  | VN | 1   |                                                                    | 4 |                                                                   | Hynek et al., 2010 |
| OBL | 73 | -11.2 | 134.1  | VN | N/A | Paleolake is contained within a heavily eroded inter-crater basin. | 4 |                                                                   | Hynek et al., 2010 |
| OBL | 74 | -9.5  | -167.2 | VN | 2   |                                                                    | 2 | Inlet valleys are heavily eroded/modified, so value is uncertain. |                    |

|     |    |       |            |    |     |                                                                                                             |   |                                                                   |                       |
|-----|----|-------|------------|----|-----|-------------------------------------------------------------------------------------------------------------|---|-------------------------------------------------------------------|-----------------------|
| OBL | 75 | -10.2 | -<br>165.6 | VN | 1   |                                                                                                             | 3 |                                                                   | Hynek et al.,<br>2010 |
| OBL | 76 | -5.9  | -<br>162.9 | VN | N/A | Paleolake is contained within a heavily degraded crater not mapped by Robbins and Hynek (2012).             | 2 |                                                                   | Hynek et al.,<br>2010 |
| OBL | 77 | -23.2 | 134.5      | VN | 1   |                                                                                                             | 3 | Inlet valleys are heavily eroded/modified, so value is uncertain. |                       |
| OBL | 78 | 0.1   | 123.3      | VN | 2   |                                                                                                             | 4 | Value taken from outlet valley system.                            | Hynek et al.,<br>2010 |
| OBL | 79 | -14.0 | 161.1      | VN | 1   |                                                                                                             | 2 | Inlet valleys are heavily eroded/modified, so value is uncertain. |                       |
| OBL | 80 | -22.8 | 159.5      | VN | 1   |                                                                                                             | 2 |                                                                   | Hynek et al.,<br>2010 |
| OBL | 81 | -4.2  | -1.7       | VN | 1   |                                                                                                             | 4 |                                                                   | Hynek et al.,<br>2010 |
| OBL | 82 | -2.6  | 62.2       | VN | 2   | Level of basin degradation is more consistent with a Robbins and Hynek (2012) basin degradation state of 1. | 4 | Value taken from outlet valley system.                            | Hynek et al.,<br>2010 |
| OBL | 83 | -26.9 | -18.3      | VN | 1   |                                                                                                             | 3 |                                                                   | Hynek et al.,<br>2010 |
| OBL | 84 | -20.5 | 87.0       | VN | 1   |                                                                                                             | 4 |                                                                   | Hynek et al.,<br>2010 |
| OBL | 85 | -13.3 | 96.5       | VN | N/A | Paleolake is contained within a heavily eroded inter-crater basin.                                          | 2 |                                                                   | Hynek et al.,<br>2010 |
| OBL | 86 | -21.6 | 56.2       | VN | N/A | Paleolake is contained within a heavily eroded inter-crater basin.                                          | 2 | Value taken from outlet valley system.                            | Hynek et al.,<br>2010 |
| OBL | 87 | -6.3  | 94.3       | VN | 1   |                                                                                                             | 4 | Value taken from outlet                                           | Hynek et al.,         |

|     |     |       |       |    |     |                                                                    |   |                                                                   |                    |
|-----|-----|-------|-------|----|-----|--------------------------------------------------------------------|---|-------------------------------------------------------------------|--------------------|
|     |     |       |       |    |     |                                                                    |   | valley system.                                                    | 2010               |
| OBL | 88  | -8.7  | 149.4 | VN | 1   |                                                                    | 1 | Value taken from outlet valley system.                            | Hynek et al., 2010 |
| OBL | 89  | -16.0 | 167.3 | VN | 1   |                                                                    | 2 | Inlet valleys are heavily eroded/modified, so value is uncertain. |                    |
| OBL | 90  | -20.0 | 170.7 | VN | 1   |                                                                    | 3 |                                                                   | Hynek et al., 2010 |
| OBL | 91  | -17.4 | 171.3 | VN | 1   |                                                                    | 1 | Paleolake is directly fed by the outlet of open-basin lake #92.   | Hynek et al., 2010 |
| OBL | 92  | -18.2 | 171.3 | VN | N/A | Paleolake is contained within a heavily eroded inter-crater basin. | 1 | Value taken from outlet valley system.                            | Hynek et al., 2010 |
| OBL | 93  | -12.8 | 16.4  | VN | 1   |                                                                    | 2 |                                                                   | Hynek et al., 2010 |
| OBL | 94  | -53.4 | -13.7 | VN | 1   |                                                                    | 2 |                                                                   | Hynek et al., 2010 |
| OBL | 95  | -22.5 | -20.5 | VN | 1   |                                                                    | 4 |                                                                   | Hynek et al., 2010 |
| OBL | 96  | -29.8 | 147.2 | VN | 1   |                                                                    | 2 |                                                                   |                    |
| OBL | 97  | -29.9 | 147.6 | VN | 1   |                                                                    | 1 | Paleolake is directly fed by the outlet of open-basin lake #96.   |                    |
| OBL | 98  | -19.7 | 78.1  | VN | 1   |                                                                    | 2 |                                                                   | Hynek et al., 2010 |
| OBL | 99  | -18.9 | 77.6  | VN | N/A | Paleolake is contained within a heavily eroded inter-crater basin. | 3 |                                                                   | Hynek et al., 2010 |
| OBL | 100 | -23.4 | 71.0  | VN | 1   |                                                                    | 2 |                                                                   | Hynek et al., 2010 |
| OBL | 101 | -23.1 | 76.5  | VN | 1   |                                                                    | 2 |                                                                   |                    |
| OBL | 102 | -23.2 | 75.6  | VN | 1   |                                                                    | 2 | Inlet valleys are heavily eroded/modified, so value is uncertain. |                    |
| OBL | 103 | -22.1 | 75.9  | VN | N/A | Paleolake is contained                                             | 2 | Inlet valleys are heavily                                         |                    |

|     |     |       |       |    |     |                                                                                                 |   |                                                                  |                    |
|-----|-----|-------|-------|----|-----|-------------------------------------------------------------------------------------------------|---|------------------------------------------------------------------|--------------------|
|     |     |       |       |    |     | within a heavily eroded inter-crater basin.                                                     |   | eroded/modified, so value is uncertain.                          |                    |
| OBL | 104 | -20.1 | 78.2  | VN | N/A | Paleolake is contained within a heavily eroded inter-crater basin.                              | 3 |                                                                  | Hynek et al., 2010 |
| OBL | 105 | -41.1 | -3.0  | VN | N/A | Paleolake is contained within a heavily eroded inter-crater basin.                              | 2 |                                                                  | Hynek et al., 2010 |
| OBL | 106 | -63.2 | -22.3 | VN | N/A | Paleolake is contained within a heavily degraded crater not mapped by Robbins and Hynek (2012). | 2 |                                                                  | Hynek et al., 2010 |
| OBL | 107 | -62.9 | -20.0 | VN | N/A | Paleolake is contained within a heavily degraded crater not mapped by Robbins and Hynek (2012). | 2 |                                                                  | Hynek et al., 2010 |
| OBL | 108 | -55.2 | -24.4 | VN | 1   |                                                                                                 | 1 | Paleolake is directly fed by the outlet of open-basin lake #109. |                    |
| OBL | 109 | -54.7 | -24.4 | VN | 1   |                                                                                                 | 3 |                                                                  | Hynek et al., 2010 |
| OBL | 110 | -52.9 | -19.0 | VN | N/A | Paleolake is contained within a heavily eroded inter-crater basin.                              | 3 |                                                                  | Hynek et al., 2010 |
| OBL | 111 | -12.7 | 11.7  | VN | N/A | Paleolake is contained within a heavily eroded inter-crater basin.                              | 5 |                                                                  | Hynek et al., 2010 |
| OBL | 112 | 13.2  | 19.5  | VN | 1   |                                                                                                 | 3 |                                                                  | Hynek et al., 2010 |
| OBL | 113 | -59.7 | -32.4 | VN | 1   |                                                                                                 | 1 | Paleolake is directly fed by the outlet of open-basin lake #122. |                    |
| OBL | 114 | -37.2 | -9.8  | VN | N/A | Paleolake is contained within a heavily eroded inter-crater basin.                              | 1 | Value taken from outlet valley system.                           | Hynek et al., 2010 |

|     |     |       |        |    |     |                                                                                                 |   |                                                                   |                    |
|-----|-----|-------|--------|----|-----|-------------------------------------------------------------------------------------------------|---|-------------------------------------------------------------------|--------------------|
| OBL | 115 | 26.8  | 74.4   | VN | 1   |                                                                                                 | 2 | Inlet valleys are heavily eroded/modified, so value is uncertain. |                    |
| OBL | 116 | -3.8  | 93.4   | VN | 1   |                                                                                                 | 2 |                                                                   | Hynek et al., 2010 |
| OBL | 117 | 28.7  | 26.2   | VN | N/A | Paleolake is contained within a heavily eroded inter-crater basin.                              | 1 | Value taken from outlet valley system.                            | Hynek et al., 2010 |
| OBL | 118 | 32.0  | 68.9   | VN | 1   |                                                                                                 | 2 | Inlet valleys are heavily eroded/modified, so value is uncertain. |                    |
| OBL | 120 | 30.3  | 68.0   | VN | 1   |                                                                                                 | 1 | Inlet valleys are heavily eroded/modified, so value is uncertain. | Hynek et al., 2010 |
| OBL | 121 | -16.1 | -174.5 | VN | 1   |                                                                                                 | 2 | Value taken from outlet valley system.                            | Hynek et al., 2010 |
| OBL | 122 | -60.1 | -31.7  | VN | N/A | Paleolake is contained within a heavily degraded crater not mapped by Robbins and Hynek (2012). | 2 |                                                                   | Hynek et al., 2010 |
| OBL | 123 | -20.4 | -21.7  | VN | N/A | Paleolake is contained within a heavily eroded inter-crater basin.                              | 6 |                                                                   | Hynek et al., 2010 |
| OBL | 124 | 26.7  | 33.1   | VN | 1   |                                                                                                 | 2 | Inlet valleys are heavily eroded/modified, so value is uncertain. |                    |
| OBL | 125 | 18.9  | 36.1   | VN | 1   |                                                                                                 | 2 | Value taken from outlet valley system.                            |                    |
| OBL | 126 | -21.6 | 57.6   | VN | 1   |                                                                                                 | 2 |                                                                   | Hynek et al., 2010 |
| OBL | 127 | 2.2   | 115.9  | VN | 1   |                                                                                                 | 2 | Inlet valleys are heavily eroded/modified, so value is uncertain. |                    |
| OBL | 128 | -33.8 | 80.9   | VN | 1   |                                                                                                 | 2 |                                                                   | Hynek et al., 2010 |

|     |     |       |            |    |     |                                                                                                             |   |                                                                   |                    |
|-----|-----|-------|------------|----|-----|-------------------------------------------------------------------------------------------------------------|---|-------------------------------------------------------------------|--------------------|
| OBL | 129 | -11.9 | -4.9       | VN | 1   |                                                                                                             | 3 | Value taken from outlet valley system.                            | Hynek et al., 2010 |
| OBL | 130 | -12.0 | -<br>177.9 | VN | 2   | Level of basin degradation is more consistent with a Robbins and Hynek (2012) basin degradation state of 1. | 3 |                                                                   | Hynek et al., 2010 |
| OBL | 131 | -5.0  | 22.3       | VN | 1   |                                                                                                             | 2 | Inlet valleys are heavily eroded/modified, so value is uncertain. |                    |
| OBL | 132 | -18.0 | 24.7       | VN | 1   |                                                                                                             | 3 |                                                                   | Hynek et al., 2010 |
| OBL | 133 | 31.0  | 19.0       | VN | 1   |                                                                                                             | 3 |                                                                   | Hynek et al., 2010 |
| OBL | 134 | -13.4 | 161.3      | VN | N/A | Paleolake is contained within a heavily eroded inter-crater basin.                                          | 2 |                                                                   | Hynek et al., 2010 |
| OBL | 135 | -39.2 | -<br>103.3 | VN | 2   |                                                                                                             | 2 |                                                                   | Hynek et al., 2010 |
| OBL | 136 | -38.6 | -<br>100.7 | VN | N/A | Paleolake is contained within a heavily eroded inter-crater basin.                                          | 2 | Value taken from outlet valley system.                            | Hynek et al., 2010 |
| OBL | 137 | -26.1 | 85.4       | VN | 1   |                                                                                                             | 2 | Inlet valleys are heavily eroded/modified, so value is uncertain. |                    |
| OBL | 138 | -19.0 | -6.3       | VN | N/A | Paleolake is contained within a heavily degraded crater not mapped by Robbins and Hynek (2012).             | 1 | Paleolake is directly fed by the outlet of open-basin lake #66.   | Hynek et al., 2010 |
| OBL | 139 | 0.0   | 28.8       | VN | 1   |                                                                                                             | 4 |                                                                   | Hynek et al., 2010 |
| OBL | 140 | -0.4  | 38.1       | VN | 1   |                                                                                                             | 4 | Value taken from outlet valley system.                            | Hynek et al., 2010 |
| OBL | 141 | -15.0 | -22.2      | VN | 2   | Level of basin                                                                                              | 3 |                                                                   | Hynek et al.,      |

|     |     |       |       |    |     |                                                                                              |     |                                                                     |                    |
|-----|-----|-------|-------|----|-----|----------------------------------------------------------------------------------------------|-----|---------------------------------------------------------------------|--------------------|
|     |     |       |       |    |     | degradation is more consistent with a Robbins and Hynek (2012) basin degradation state of 1. |     |                                                                     | 2010               |
| OBL | 142 | -48.5 | -     | VN | N/A | Paleolake is contained within a heavily eroded inter-crater basin.                           | 4   | Value taken from outlet valley system.                              | Hynek et al., 2010 |
| OBL | 143 | -53.9 | 14.7  | VN | 1   |                                                                                              | N/A | Insufficient image coverage to confidently assign a Strahler order. | Hynek et al., 2010 |
| OBL | 144 | -36.3 | -11.5 | VN | N/A | Paleolake is contained within a heavily eroded inter-crater basin.                           | 3   |                                                                     | Hynek et al., 2010 |
| OBL | 145 | -31.5 | -14.0 | VN | N/A | Paleolake is contained within a heavily eroded inter-crater basin.                           | 6   | Value taken from outlet valley system.                              | Hynek et al., 2010 |
| OBL | 146 | -22.3 | -23.6 | VN | 1   |                                                                                              | 3   |                                                                     | Hynek et al., 2010 |
| OBL | 147 | -26.5 | -4.0  | VN | 1   |                                                                                              | 2   |                                                                     | Hynek et al., 2010 |
| OBL | 148 | -26.8 | -11.1 | VN | 1   |                                                                                              | 2   | Inlet valleys are heavily eroded/modified, so value is uncertain.   |                    |
| OBL | 149 | -10.0 | 41.1  | VN | 1   |                                                                                              | 2   |                                                                     | Hynek et al., 2010 |
| OBL | 150 | -9.0  | 41.5  | VN | 1   |                                                                                              | 4   |                                                                     | Hynek et al., 2010 |
| OBL | 151 | 26.4  | 66.7  | VN | N/A | Paleolake is contained within a heavily eroded inter-crater basin.                           | 2   | Inlet valleys are heavily eroded/modified, so value is uncertain.   |                    |
| OBL | 152 | 27.7  | 67.2  | VN | 1   |                                                                                              | 1   | Paleolake is directly fed by the outlet of open-basin lake #151.    |                    |
| OBL | 153 | 3.1   | 86.6  | VN | 1   |                                                                                              | 2   |                                                                     |                    |

|     |     |       |            |    |     |                                                                                                 |   |                                                                   |                    |
|-----|-----|-------|------------|----|-----|-------------------------------------------------------------------------------------------------|---|-------------------------------------------------------------------|--------------------|
| OBL | 154 | -18.7 | 174.9      | VN | 1   |                                                                                                 | 3 |                                                                   | Hynek et al., 2010 |
| OBL | 155 | -11.6 | -<br>159.6 | VN | 1   |                                                                                                 | 3 |                                                                   |                    |
| OBL | 156 | -11.2 | -<br>159.8 | VN | N/A | Paleolake is contained within a heavily degraded crater not mapped by Robbins and Hynek (2012). | 1 | Paleolake is directly fed by the outlet of open-basin lake #155.  |                    |
| OBL | 157 | -40.4 | -54.9      | VN | N/A | Paleolake is contained within a heavily eroded inter-crater basin.                              | 2 |                                                                   |                    |
| OBL | 158 | -45.2 | -58.4      | VN | N/A | Paleolake is contained within a heavily eroded inter-crater basin.                              | 2 |                                                                   | Hynek et al., 2010 |
| OBL | 159 | -37.5 | -45.7      | VN | N/A | Paleolake is contained within a heavily eroded inter-crater basin.                              | 3 |                                                                   | Hynek et al., 2010 |
| OBL | 160 | -36.7 | -45.2      | VN | N/A | Paleolake is contained within a heavily eroded inter-crater basin.                              | 2 |                                                                   |                    |
| OBL | 161 | -36.2 | -44.6      | VN | N/A | Paleolake is contained within a heavily eroded inter-crater basin.                              | 3 |                                                                   | Hynek et al., 2010 |
| OBL | 162 | -35.7 | -44.6      | VN | N/A | Paleolake is contained within a heavily eroded inter-crater basin.                              | 3 |                                                                   | Hynek et al., 2010 |
| OBL | 163 | -37.4 | -45.3      | VN | N/A | Paleolake is contained within a heavily eroded inter-crater basin.                              | 2 |                                                                   |                    |
| OBL | 164 | -11.2 | 15.7       | VN | 1   |                                                                                                 | 3 |                                                                   | Hynek et al., 2010 |
| OBL | 165 | 20.8  | 39.1       | VN | 1   |                                                                                                 | 2 | Inlet valleys are heavily eroded/modified, so value is uncertain. |                    |



|     |     |       |       |    |     |                                                                                                             |   |                                                                   |                    |
|-----|-----|-------|-------|----|-----|-------------------------------------------------------------------------------------------------------------|---|-------------------------------------------------------------------|--------------------|
| OBL | 166 | -6.4  | 24.4  | VN | 1   |                                                                                                             | 2 |                                                                   | Hynek et al., 2010 |
| OBL | 167 | -1.9  | 102.8 | VN | N/A | Paleolake is contained within a heavily eroded inter-crater basin.                                          | 2 |                                                                   |                    |
| OBL | 168 | 9.6   | -46.2 | VN | 3   | Level of basin degradation is more consistent with a Robbins and Hynek (2012) basin degradation state of 1. | 2 |                                                                   | Hynek et al., 2010 |
| OBL | 169 | -8.6  | 139.7 | VN | 1   |                                                                                                             | 1 | Inlet valley is clearly buried by younger material.               |                    |
| OBL | 170 | -10.3 | 142.4 | VN | 1   |                                                                                                             | 3 |                                                                   | Hynek et al., 2010 |
| OBL | 171 | -21.3 | -5.3  | VN | 1   |                                                                                                             | 4 |                                                                   | Hynek et al., 2010 |
| OBL | 172 | -10.1 | 131.8 | VN | 1   |                                                                                                             | 3 | Value taken from outlet valley system.                            | Hynek et al., 2010 |
| OBL | 173 | -10.5 | 131.4 | VN | 2   |                                                                                                             | 3 | Value taken from outlet valley system.                            | Hynek et al., 2010 |
| OBL | 174 | -10.7 | 132.5 | VN | 1   |                                                                                                             | 4 | Value taken from outlet valley system.                            | Hynek et al., 2010 |
| OBL | 175 | -22.0 | 132.5 | VN | 1   |                                                                                                             | 3 |                                                                   | Hynek et al., 2010 |
| OBL | 176 | -27.1 | 142.1 | VN | 1   |                                                                                                             | 2 |                                                                   | Hynek et al., 2010 |
| OBL | 177 | -26.9 | 141.3 | VN | 1   |                                                                                                             | 1 | Inlet valleys are heavily eroded/modified, so value is uncertain. |                    |
| OBL | 178 | 27.3  | 37.1  | VN | N/A | Paleolake is contained within a heavily eroded inter-crater basin.                                          | 2 | Value taken from outlet valley system.                            | Hynek et al., 2010 |
| OBL | 179 | 20.6  | 32.3  | VN | N/A | Paleolake is contained within a heavily eroded                                                              | 2 | Inlet valleys are heavily eroded/modified, so                     |                    |

|     |     |       |       |    |     |                                                                    |   |                                                                   |                    |
|-----|-----|-------|-------|----|-----|--------------------------------------------------------------------|---|-------------------------------------------------------------------|--------------------|
|     |     |       |       |    |     | inter-crater basin.                                                |   | value is uncertain.                                               |                    |
| OBL | 180 | -34.0 | 179.1 | VN | 1   |                                                                    | 2 | Inlet valleys are heavily eroded/modified, so value is uncertain. |                    |
| OBL | 181 | -5.7  | 46.6  | VN | 1   |                                                                    | 4 | Value taken from outlet valley system.                            | Hynek et al., 2010 |
| OBL | 182 | -5.6  | 57.3  | VN | 1   |                                                                    | 2 |                                                                   | Hynek et al., 2010 |
| OBL | 183 | -5.1  | 43.8  | VN | 1   |                                                                    | 5 | Value taken from outlet valley system.                            | Hynek et al., 2010 |
| OBL | 184 | -2.8  | 33.6  | VN | 1   |                                                                    | 4 |                                                                   | Hynek et al., 2010 |
| OBL | 185 | 2.2   | 45.5  | VN | 1   |                                                                    | 2 |                                                                   | Hynek et al., 2010 |
| OBL | 186 | 0.5   | 42.9  | VN | 1   |                                                                    | 2 |                                                                   |                    |
| OBL | 187 | -7.2  | 43.0  | VN | 1   |                                                                    | 4 |                                                                   | Hynek et al., 2010 |
| OBL | 188 | 13.1  | 36.1  | VN | 1   |                                                                    | 3 | Inlet valleys are heavily eroded/modified, so value is uncertain. | Hynek et al., 2010 |
| OBL | 189 | 14.9  | 38.4  | VN | 1   |                                                                    | 1 | Value taken from outlet valley system.                            |                    |
| OBL | 190 | -16.5 | -18.1 | VN | N/A | Paleolake is contained within a heavily eroded inter-crater basin. | 7 | Value taken from outlet valley system.                            | Hynek et al., 2010 |
| OBL | 191 | -24.9 | 6.1   | VN | N/A | Paleolake is contained within a heavily eroded inter-crater basin. | 3 | Value taken from outlet valley system.                            | Hynek et al., 2010 |
| OBL | 192 | -23.5 | 6.7   | VN | 1   |                                                                    | 3 |                                                                   | Hynek et al., 2010 |
| OBL | 193 | -4.5  | 22.0  | VN | 1   |                                                                    | 1 | Paleolake is directly fed by the outlet of open-basin lake #131.  | Hynek et al., 2010 |
| OBL | 194 | 3.0   | 86.9  | VN | 1   |                                                                    | 1 | Value taken from outlet valley system.                            |                    |
| OBL | 195 | 3.5   | 83.2  | VN | 1   |                                                                    | 2 |                                                                   |                    |

|     |     |       |       |    |     |                                                                                                             |   |                                                                   |                    |
|-----|-----|-------|-------|----|-----|-------------------------------------------------------------------------------------------------------------|---|-------------------------------------------------------------------|--------------------|
| OBL | 196 | 0.6   | 91.3  | VN | N/A | Paleolake is contained within a heavily eroded inter-crater basin.                                          | 2 | Inlet valleys are heavily eroded/modified, so value is uncertain. |                    |
| OBL | 197 | 3.3   | 89.8  | VN | 2   | Level of basin degradation is more consistent with a Robbins and Hynek (2012) basin degradation state of 1. | 2 | Value taken from outlet valley system.                            |                    |
| OBL | 198 | 5.8   | 94.6  | VN | N/A | Paleolake is contained within a heavily eroded inter-crater basin.                                          | 1 | Value taken from outlet valley system.                            |                    |
| OBL | 199 | -22.9 | 158.5 | VN | 1   |                                                                                                             | 2 | Value taken from outlet valley system.                            | Hynek et al., 2010 |
| OBL | 200 | 1.1   | 102.5 | VN | 1   |                                                                                                             | 1 | Value taken from outlet valley system.                            |                    |
| OBL | 201 | -2.4  | 112.1 | VN | N/A | Paleolake is contained within a heavily eroded inter-crater basin.                                          | 3 |                                                                   | Hynek et al., 2010 |
| OBL | 202 | 5.2   | 39.7  | VN | 1   |                                                                                                             | 2 | Value taken from outlet valley system.                            | Hynek et al., 2010 |
| OBL | 203 | -3.8  | 126.6 | VN | 1   |                                                                                                             | 5 | Value taken from outlet valley system.                            | Hynek et al., 2010 |
| OBL | 204 | -41.2 | -23.2 | VN | N/A | Paleolake is contained within a heavily eroded inter-crater basin.                                          | 2 | Value taken from outlet valley system.                            | Hynek et al., 2010 |
| OBL | 205 | -31.1 | 25.5  | VN | 1   |                                                                                                             | 2 | Value taken from outlet valley system.                            | Hynek et al., 2010 |
| OBL | 206 | -30.6 | 21.2  | VN | 1   |                                                                                                             | 2 | Value taken from outlet valley system.                            |                    |
| OBL | 207 | -32.8 | 25.3  | VN | 2   | Level of basin degradation is more consistent with a Robbins and Hynek (2012) basin degradation state of 1. | 2 |                                                                   |                    |

|     |     |       |       |    |     |                                                                                                             |   |                                                                   |                    |
|-----|-----|-------|-------|----|-----|-------------------------------------------------------------------------------------------------------------|---|-------------------------------------------------------------------|--------------------|
| OBL | 208 | -17.1 | 161.0 | VN | 1   |                                                                                                             | 2 | Value taken from outlet valley system.                            |                    |
| OBL | 209 | -0.9  | 101.6 | VN | 1   |                                                                                                             | 3 | Value taken from outlet valley system.                            | Hynek et al., 2010 |
| OBL | 210 | -5.1  | -4.5  | VN | 1   |                                                                                                             | 2 |                                                                   | Hynek et al., 2010 |
| OBL | 211 | -28.3 | 73.7  | VN | 1   |                                                                                                             | 2 | Inlet valleys are heavily eroded/modified, so value is uncertain. |                    |
| OBL | 212 | -27.7 | 76.1  | VN | N/A | Paleolake is contained within a heavily eroded inter-crater basin.                                          | 2 |                                                                   | Hynek et al., 2010 |
| OBL | 214 | -27.0 | -32.1 | VN | N/A | Paleolake is contained within a heavily eroded inter-crater basin.                                          | 2 | Inlet valleys are heavily eroded/modified, so value is uncertain. |                    |
| OBL | 215 | -30.1 | 73.4  | VN | 2   |                                                                                                             | 1 | Paleolake is directly fed by the outlet of open-basin lake #211.  |                    |
| OBL | 216 | 35.1  | 21.7  | VN | 1   |                                                                                                             | 2 | Inlet valleys are heavily eroded/modified, so value is uncertain. |                    |
| OBL | 217 | 35.6  | 24.8  | VN | 1   |                                                                                                             | 2 | Value taken from outlet valley system.                            |                    |
| OBL | 219 | -37.2 | 102.3 | VN | 1   |                                                                                                             | 2 |                                                                   | Hynek et al., 2010 |
| OBL | 221 | -36.5 | 164.5 | VN | N/A | Paleolake is contained within a heavily eroded inter-crater basin.                                          | 2 | Inlet valleys are heavily eroded/modified, so value is uncertain. | Hynek et al., 2010 |
| OBL | 222 | -3.2  | -26.4 | VN | 2   | Level of basin degradation is more consistent with a Robbins and Hynek (2012) basin degradation state of 1. | 2 |                                                                   | Hynek et al., 2010 |
| OBL | 223 | -2.9  | -26.3 | VN | 1   |                                                                                                             | 4 | Value taken from outlet valley system.                            | Hynek et al., 2010 |

|     |     |       |       |    |   |  |   |  |                       |
|-----|-----|-------|-------|----|---|--|---|--|-----------------------|
| OBL | 224 | -38.2 | 102.2 | VN | 1 |  | 2 |  | Hynek et al.,<br>2010 |
| OBL | 225 | 35.2  | 21.2  | VN | 2 |  | 3 |  | Hynek et al.,<br>2010 |
| OBL | 226 | -29.8 | -77.1 | VN | 1 |  | 2 |  |                       |

\* CBL = closed-basin lake, OBL = open-basin lake.

† Closed-basin lake basin numbers are from Goudge et al. (2015), open-basin lake basin numbers are from Fassett and Head (2008b) and Goudge et al. (2012).

§ II = isolated inlet valley, VN = valley network.

# Values are from Robbins and Hynek (2012).

TABLE DR2. CLOSED-BASIN LAKES WITH STRATIGRAPHIC RELATIONSHIPS TO CONTINUOUS EJECTA DEPOSITS.

| <b>Basin Number<sup>*</sup></b> | <b>Inlet Type</b> | <b>Lat. (°N)</b> | <b>Lon. (°E)</b> | <b>Crater Ejecta Degradation State</b> |
|---------------------------------|-------------------|------------------|------------------|----------------------------------------|
| 2                               | Isolated Inlet    | 22.1             | -8.2             | Largely eroded.                        |
| 3                               | Isolated Inlet    | 14.8             | -51.7            | Largely eroded.                        |
| 5                               | Isolated Inlet    | 10.2             | -16.7            | Minimally eroded.                      |
| 12                              | Isolated Inlet    | -7.8             | 25.3             | Largely eroded.                        |
| 21                              | Isolated Inlet    | 55.0             | -84.4            | Partially eroded.                      |
| 24                              | Isolated Inlet    | 41.1             | -2.9             | Partially eroded.                      |
| 36 <sup>†</sup>                 | Isolated Inlet    | 34.4             | 3.2              | Minimally eroded.                      |
| 40                              | Isolated Inlet    | 31.6             | -5.7             | Largely eroded.                        |
| 44                              | Isolated Inlet    | 26.2             | 37.5             | Largely eroded.                        |
| 45                              | Isolated Inlet    | 26.2             | 24.1             | Largely eroded.                        |
| 46                              | Isolated Inlet    | 27.1             | 21.4             | Largely eroded.                        |
| 49                              | Isolated Inlet    | 27.7             | -124.5           | Minimally eroded.                      |
| 50                              | Isolated Inlet    | 25.1             | -97.5            | Minimally eroded.                      |
| 51                              | Isolated Inlet    | 31.4             | -13.0            | Minimally eroded.                      |
| 54                              | Isolated Inlet    | 21.4             | 58.1             | Largely eroded.                        |
| 55                              | Isolated Inlet    | 21.4             | 37.8             | Largely eroded.                        |
| 61                              | Isolated Inlet    | 19.9             | 12.0             | Largely eroded.                        |
| 63                              | Isolated Inlet    | 16.2             | -53.2            | Minimally eroded.                      |
| 66                              | Isolated Inlet    | 13.2             | 9.2              | Almost completely eroded.              |
| 69                              | Isolated Inlet    | 10.9             | -14.0            | Minimally eroded.                      |
| 73                              | Isolated Inlet    | 8.2              | -49.3            | Almost completely eroded.              |
| 74                              | Isolated Inlet    | 9.9              | -46.6            | Almost completely eroded.              |
| 75                              | Isolated Inlet    | 7.8              | -39.1            | Almost completely eroded.              |
| 77                              | Isolated Inlet    | 8.5              | -15.8            | Partially eroded.                      |
| 82                              | Isolated Inlet    | 7.0              | -53.6            | Largely eroded.                        |
| 83                              | Isolated Inlet    | 2.4              | -51.6            | Minimally eroded.                      |
| 92                              | Isolated Inlet    | 1.5              | 116.3            | Minimally eroded.                      |
| 94                              | Isolated Inlet    | -1.4             | -39.7            | Largely eroded.                        |
| 96                              | Isolated Inlet    | -2.9             | 67.7             | Largely eroded.                        |
| 97                              | Valley Network    | -5.2             | 137.8            | Largely eroded.                        |
| 99                              | Isolated Inlet    | -4.8             | 2.0              | Partially eroded.                      |
| 103                             | Isolated Inlet    | -10.0            | -158.1           | Largely eroded.                        |
| 113                             | Isolated Inlet    | -10.6            | 139.7            | Largely eroded.                        |
| 117                             | Isolated Inlet    | -12.0            | 123.7            | Largely eroded.                        |
| 118                             | Isolated Inlet    | -10.8            | 91.2             | Partially eroded.                      |
| 138                             | Isolated Inlet    | -15.5            | -155.5           | Largely eroded.                        |

|                  |                |       |        |                   |
|------------------|----------------|-------|--------|-------------------|
| 149              | Isolated Inlet | -22.6 | -56.6  | Partially eroded. |
| 154              | Isolated Inlet | -25.3 | 71.9   | Largely eroded.   |
| 196              | Isolated Inlet | -46.3 | -163.8 | Largely eroded.   |
| 199              | Isolated Inlet | 22.1  | 66.8   | Largely eroded.   |
| 202              | Isolated Inlet | -37.5 | -158.8 | Minimally eroded. |
| 203 <sup>†</sup> | Valley Network | -24.0 | -33.3  | Largely eroded.   |
| 204              | Valley Network | -26.0 | -34.0  | Largely eroded.   |
| 205              | Isolated Inlet | 20.7  | 75.8   | Minimally eroded. |

\*Basin number is from Goudge et al. (2015).

<sup>†</sup>Inlet valley incises ejecta from nearby crater.

### ADDITIONAL REFERENCES CITED

- Fassett, C.I., and Head, J.W., 2007, Valley formation on martian volcanoes in the Hesperian: Evidence for melting of summit snowpack, caldera lake formation, drainage and erosion on Ceraunius Tholus: *Icarus*, v. 189, p. 118–135, doi:10.1016/j.icarus.2006.12.021.
- Irwin, R.P., Maxwell, T.A., Howard, A.D., Craddock, R.A., and Leverington, D.W., 2002, A large paleolake basin at the head of Ma'adim Vallis, Mars: *Science*, v. 296, p. 2209–2212, doi:10.1126/science.1071143.
- Schon, S.C., Head, J.W., and Fassett, C.I., 2012, An overfilled lacustrine system and progradational delta in Jezero crater, Mars: Implications for Noachian climate: *Planetary and Space Science*, v. 67, p. 28-45, doi:10.1016/j.pss.2012.02.003.
- Strahler, A.N., 1952, Hypsometric (area-altitude) analysis of erosional topography: *Bulletin of the Geological Society of America*, v. 63, p. 1117–1142, doi:10.1130/0016-7606(1952)63[1117:HAAOET]2.0.CO;2.
